1 **Structural Basis and Mode of Action for Two Broadly Neutralizing Antibodies Against**  
2 **SARS-CoV-2 Emerging Variants of Concern**

3

4 Wenwei Li<sup>1,#</sup>, Yaozong Chen<sup>2,#</sup>, Jérémie Prévost<sup>3,4,#</sup>, Irfan Ullah<sup>5</sup>, Maolin Lu<sup>1,%</sup>, Shang Yu  
5 Gong<sup>3,6</sup>, Alexandra Tauzin<sup>3,4</sup>, Romain Gasser<sup>3,4</sup>, Dani Vézina<sup>3,4</sup>, Sai Priya Anand<sup>3,6</sup>, Guillaume  
6 Goyette<sup>3</sup>, Debashree Chatterjee<sup>3</sup>, Shilei Ding<sup>3</sup>, William D. Tolbert<sup>2</sup>, Michael W. Grunst<sup>1</sup>, Yuxia  
7 Bo<sup>7</sup>, Shijian Zhang<sup>8,9</sup>, Jonathan Richard<sup>3,4</sup>, Fei Zhou<sup>10</sup>, Rick K. Huang<sup>10</sup>, Lothar Esser<sup>10</sup>, Allison  
8 Zeher<sup>10</sup>, Marceline Côté<sup>7</sup>, Priti Kumar<sup>5</sup>, Joseph Sodroski<sup>8,9</sup>, Di Xia<sup>10</sup>, Pradeep D. Uchil<sup>1</sup>,  
9 Marzena Pazgier<sup>2,\*</sup>, Andrés Finzi<sup>3,4,6,\*</sup>, and Walther Mothes<sup>1,\*</sup>

10

11 <sup>1</sup>Department of Microbial Pathogenesis, Yale University School of Medicine, New Haven, CT,  
12 USA.

13 <sup>2</sup>Infectious Disease Division, Department of Medicine, Uniformed Services University of the  
14 Health Sciences, Bethesda, MD 20814-4712, USA.

15 <sup>3</sup>Centre de Recherche du CHUM (CRCHUM), Montreal, QC H2X 0A9, Canada.

16 <sup>4</sup>Département de Microbiologie, Infectiologie et Immunologie, Université de Montréal, Montreal,  
17 QC H2X 0A9, Canada.

18 <sup>5</sup>Department of Internal Medicine, Section of Infectious Diseases, Yale University School of  
19 Medicine, New Haven, CT 06520.

20 <sup>6</sup>Department of Microbiology and Immunology, McGill University, Montreal, QC H3A 2B4,  
21 Canada.

22 <sup>7</sup>Department of Biochemistry, Microbiology and Immunology, and Center for Infection, Immunity,  
23 and Inflammation, University of Ottawa, Ottawa, ON K1H 8M5, Canada.

24 <sup>8</sup>Department of Cancer Immunology and Virology, Dana-Farber Cancer Institute, Boston, MA,  
25 USA.

26 <sup>9</sup>Department of Microbiology, Harvard Medical School, Boston, MA, USA.

27 <sup>10</sup>Laboratory of Cell Biology, National Cancer Institute, National Institutes of Health, Bethesda,  
28 MD 20892, USA.

29

30 <sup>#</sup>These authors contributed equally

31 % Current address: Department of Cellular and Molecular Biology, University of Texas Health  
32 Science Center at Tyler, Tyler, TX 75708

33 \*For correspondence: \*email: [marzena.pazgier@usuhs.edu](mailto:marzena.pazgier@usuhs.edu), [andres.finzi@umontreal.ca](mailto:andres.finzi@umontreal.ca),  
34 [walther.mothes@yale.edu](mailto:walther.mothes@yale.edu)

35

## 36 **Summary**

37 Emerging variants of concern for the severe acute respiratory syndrome coronavirus 2 (SARS-  
38 CoV-2) can transmit more efficiently and partially evade protective immune responses, thus  
39 necessitating continued refinement of antibody therapies and immunogen design. Here we  
40 elucidate the structural basis and mode of action for two potent SARS-CoV-2 Spike (S)  
41 neutralizing monoclonal antibodies CV3-1 and CV3-25 that remained effective against emerging  
42 variants of concern in vitro and in vivo. CV3-1 bound to the (485-GFN-487) loop within the  
43 receptor-binding domain (RBD) in the “RBD-up” position and triggered potent shedding of the  
44 S1 subunit. In contrast, CV3-25 inhibited membrane fusion by binding to an epitope in the stem  
45 helix region of the S2 subunit that is highly conserved among  $\beta$ -coronaviruses. Thus, vaccine  
46 immunogen designs that incorporate the conserved regions in RBD and stem helix region are  
47 candidates to elicit pan-coronavirus protective immune responses.

48

## 49 **Introduction**

50 Severe acute respiratory syndrome coronavirus-2 (SARS-CoV-2) is the third coronavirus to  
51 enter the human population since 2003 and is responsible for the coronavirus disease of 2019  
52 (COVID-19) pandemic (Dong et al., 2020; Zhu et al., 2020). While over ~1 billion vaccines have  
53 been administered as of today (Baden et al., 2020; Folegatti et al., 2020; Logunov et al., 2021;  
54 Polack et al., 2020; Sadoff et al., 2021a; Sadoff et al., 2021b; Voysey et al., 2021), the  
55 pandemic remains uncontrolled in many countries and new variants, including the B.1.1.7  
56 (SARS-CoV-2  $\alpha$ ), B.1.351 ( $\beta$ ), P.1 ( $\gamma$ ), and B.1.617.2 ( $\delta$ ), are outcompeting previous variants  
57 due to higher transmissibility and elevated immune evasion (Campbell et al., 2021; Hoffmann et  
58 al., 2021; Planas et al., 2021a; Planas et al., 2021b; Prévost and Finzi, 2021; Volz et al., 2021).  
59 The spike protein (S) on the surface of the virus mediates entry into cells and is a prominent  
60 target for the host immune response including neutralizing antibodies. Consequently, S is a  
61 main immunogen for vaccine design. The Moderna, Pfizer-BioNTech, Johnson & Johnson and  
62 AstraZeneca vaccines are all based on S immunogens (Baden et al., 2020; Folegatti et al., 2020;  
63 Polack et al., 2020; Sadoff et al., 2021a; Sadoff et al., 2021b; Voysey et al., 2021). S consists of  
64 a trimer of S1/S2 heterodimers. S1 contains the receptor-binding domain (RBD) that interacts  
65 with the cellular receptor angiotensin-converting enzyme 2 (ACE2) (Hoffmann et al., 2020; Li et  
66 al., 2003; Walls et al., 2020). S2 possesses the fusion machinery, which can mediate host-viral  
67 membrane fusion after S1 shedding. Structural insights into the S protein have been gained by

68 single particle cryo electron microscopy (SP cryoEM) of a soluble trimer comprising most of the  
69 ectodomain (Walls et al., 2020; Wrapp et al., 2020), as well as by cryo-electron tomography  
70 (cryoET) and SP cryoEM of native virus particles (Ke et al., 2020; Turoňová et al., 2020; Yao et  
71 al., 2020). These studies have revealed several distinct prefusion conformations wherein three  
72 RBD adopt up or down orientations. Receptor ACE2 binds and stabilizes RBD in the up  
73 conformation (Lan et al., 2020; Shang et al., 2020; Xiao et al., 2021; Xu et al., 2021). Single  
74 molecule fluorescence resonance energy transfer (smFRET) imaging of single spike molecules  
75 on the surface of virus particles has provided real-time information for transitions between both  
76 RBD-up and down conformations through one necessary intermediate (Lu et al., 2020).

77 Antibodies isolated from convalescent patients, vaccinated individuals and previous work on the  
78 related SARS-CoV-1 and MERS-CoV viruses can be classified by their specificity for three main  
79 epitopes: the RBD, the N-terminal domain (NTD) and the S2 subunit (Barnes et al., 2020b;  
80 Jennewein et al., 2021; Ju et al., 2020; Liu et al., 2020; Montefiori and Acharya, 2021; Ullah et  
81 al., 2021). For each class the conformational preferences for either RBD-up or RBD-down trimer  
82 configurations have been described. Antibodies directed against the RBD are often attenuated  
83 against emerging variants of concern due to escape mutations (Greaney et al., 2021a; Liu et al.,  
84 2021; Starr et al., 2021; Weisblum et al., 2020). Although immune responses elicited by existing  
85 vaccines do offer protection to varying degrees against all known variants of concern  
86 (Skowronski et al., 2021; Tauzin et al., 2021), a booster shot to ensure sufficient protection from  
87 future emerging variants might be needed. Moreover, SARS-CoV-2 is the third  $\beta$ -coronavirus  
88 after SARS-CoV-1 and MERS-CoV to be transferred to humans in the 21<sup>st</sup> century and given  
89 the large natural reservoir of similar viruses in species such as bats (Anthony et al.; Ge et al.,  
90 2013; Letko et al., 2020; Menachery et al., 2015; Menachery et al., 2016; Wang et al., 2018),  
91 another pandemic caused by a new coronavirus is likely to happen again. These coronaviruses  
92 possess a conserved S2 domain, which raises the possibility of cross-reactive antibodies and  
93 cross-reactive vaccines. SARS-CoV-2 S is approximately 75% homologous to SARS-CoV-1 and  
94 35% to MERS S (Grifoni et al., 2020; Zhou et al., 2020). Various cross-reactive antibodies have  
95 been identified (Hoffmann et al., 2020; Jennewein et al., 2021; Ma et al., 2020; Ng et al., 2020;  
96 Song et al., 2020; Tian et al., 2020; Wang et al., 2020; Wang et al., 2021). Recently isolated  
97 antibodies capable of cross-neutralizing human coronaviruses bind to the conserved stem helix  
98 region on S2, reviving hopes for pan-coronavirus vaccines (Pinto et al., 2021; Sauer et al., 2021;  
99 Zhou et al., 2021).

100 We previously characterized two potent S-binding antibodies, CV3-1 and CV3-25, out of 198  
101 antibodies isolated from convalescent patients (Jennewein et al., 2021; Ullah et al., 2021). CV3-  
102 1 targets the RBD of S1 and CV3-25 binds to the S2 ectodomain, the former displaying the most  
103 potent neutralizing activity among all antibodies (Abs) isolated. While CV3-1 is specific for the  
104 RBD of SARS-CoV-2, CV3-25 can recognize the S2 domains derived from several  $\beta$ -  
105 coronaviruses (Jennewein et al., 2021). Both antibodies protected against SARS-CoV-2 in  
106 animal models in prophylactic and therapeutic settings (Ullah et al., 2021). Here we report the  
107 structural basis and mode of action for these two potent antibodies. We deployed cryoET of  
108 virus like particles (VLPs) carrying the  $S_{B.1.1.7}$  variant to determine the epitopes of these two  
109 antibodies. CV3-1 bound to the tip region (485-GFN-487 loop) within the receptor-binding motif  
110 (RBM), as confirmed by mutagenesis. Interestingly, we observed that most spikes in CV3-1-  
111 treated virus-like particles (VLP) were triggered into the post-fusion conformation of S2 and  
112 caused S1 shedding into the supernatant. The data indicate that CV3-1 is a potent agonist and  
113 point to the 485-GFN-487 loop as an allosteric center critical for the activation of S1. In contrast,  
114 CV3-25 bound the stem helix in the connecting domain (CD) of S2 and blocked membrane  
115 fusion. Its binding was asymmetric as S trimer was bound by 1 or 2 CV3-25 antigen-binding  
116 fragments (Fabs). Peptide competition narrowed the epitope and permitted the determination of  
117 the crystal structure of the S2 stem peptide bound to CV3-25 Fab. The structure revealed a  
118 unique bent conformation of the viral peptide with an upstream  $\alpha$ -helical region followed by a  
119 random coil. Fitting of the X-ray structure into the cryoET density map demonstrated that an  
120 increasing degree of stem helix rotation was required to allow binding of one or both Fabs to  
121 avoid steric clashes. Compared to other recently reported stem helix engaging antibodies, the  
122 advantage of CV3-25 appears to be that it binds to the flexible loop, likely facilitating stem helix  
123 engagement. Given that the stem helix epitope is highly conserved among  $\beta$ -coronaviruses,  
124 immunogens featuring this S2 epitope are interesting candidates for vaccines to cover all  
125 variants and possibly exhibit pan-coronavirus efficacy. Moreover, since many antibodies that  
126 bind spike are non-neutralizing, our work suggests that agonist features that prematurely trigger  
127 and thereby irreversibly inactivate S, or inhibition of membrane fusion, contribute to the ability of  
128 neutralizing antibodies to block SARS-CoV-2 infection.

129

## 130 **Results**

### 131 **CV3-1 and CV3-25 Neutralize Emerging SARS-CoV-2 Variants**

132 We first tested the ability of CV3-1 and CV3-25 to recognize and neutralize the emerging  
133 variants of concern, B.1.1.7 (SARS-CoV-2  $\alpha$ ), B.1.351 ( $\beta$ ), P.1 ( $\gamma$ ), B.1.617.2 ( $\delta$ ) as well as  
134 variants of interest B.1.429 ( $\epsilon$ ), B.1.525 ( $\eta$ ), B.1.526 ( $\iota$ ) and B.1.617.1 ( $\kappa$ ). CV3-1 efficiently  
135 bound to cells expressing spike proteins from these different SARS-CoV-2 variants or carrying  
136 their individual mutations (Figure 1A & S1A). Despite the presence of variant-specific mutations  
137 in RBD, CV3-1 retained potent neutralizing activity ( $IC_{50}$  0.004-0.014  $\mu$ g/ml) (Figure 1B). Of note,  
138 CV3-1 binding to the B.1.1.7 variant with and without the additional E484K substitution was  
139 higher than binding to the spike from the original Wuhan strain (WT). CV3-25 was less potent  
140 with an  $IC_{50}$  in the range of  $\sim$ 0.05-0.2  $\mu$ g/ml, but remained effective against all variants in both  
141 binding ability and neutralization (Figure 1A, B, Figure S1B). Both CV3-1 IgG and the CV3-25  
142 IgG GASDALIE mutant, which binds more strongly to  $Fc\gamma$  receptors, also protected *in vivo*  
143 against both the B.1.1.7 ( $\alpha$ ) (Ullah et al., 2021) and B.1.351 ( $\beta$ ) variants of SARS-CoV-2 in the  
144 K18-hACE2 prophylactic mouse model (Figure 1C-E). Both antibodies limited viral replication in  
145 the nose and lungs as well as its dissemination to the brain, thereby reducing the induction of  
146 pro-inflammatory cytokines (Figure S1C-F). These data demonstrate that in contrast to other  
147 antibodies that are attenuated against emerging variants (Greaney et al., 2021a; Liu et al., 2021;  
148 Starr et al., 2021; Weisblum et al., 2020), CV3-1 and CV3-25 remain potent against these  
149 variants and are therefore prime candidates to elucidate the mode of action and identify  
150 epitopes with pan-coronavirus activity.

151

## 152 **Spike Conformational Preferences of CV3-1 and CV3-25 Assessed by smFRET and** 153 **CryoET**

154 We utilized smFRET as a dynamic method and cryoET as a static method to characterize the  
155 conformational preferences of CV3-1 and CV3-25 for S of the B.1.1.7 variant ( $S_{B.1.1.7}$ ). smFRET  
156 measures the conformational state within a single S1 protomer and indicated that the  
157 unliganded  $S_{B.1.1.7}$  has access to 4 distinct conformational states, with the  $\sim$ 0.5 FRET state being  
158 the most occupied state (Figure 2A). We had previously established that these states  
159 correspond to the RBD-down ( $\sim$ 0.5 FRET), RBD-up ( $\sim$ 0.1 FRET), a necessary structural  
160 intermediate ( $\sim$ 0.3 FRET) in the transition from RBD-down to RBD-up that is likely observed in a  
161 protomer adjacent to an RBD-up, and a high-FRET state ( $\sim$ 0.8) for which a structure is not  
162 available (Lu et al., 2020). CV3-1 redistributed the conformational landscape of S to the  $\sim$ 0.1  
163 low FRET state that corresponds to the RBD-up thus mimicking receptor ACE2. CV3-25

164 redistributed the conformational landscape towards activation with an increase in the occupancy  
165 of the structural intermediate ( $\sim 0.3$  FRET) as well as the RBD-up state ( $\sim 0.1$  FRET) (Figure 2A,  
166 B). Overall, the conformational landscapes of the  $S_{B.1.1.7}$  variant and the conformational  
167 preferences of CV3-1 and CV3-25 were similar to the original Wuhan strain (Ullah et al., 2021).

168 We next used cryoET to identify the epitope for CV3-1 and CV3-25 and analyze their  
169 conformational preference by quantifying the proportion of antibody-bound trimers in the 3-RBD-  
170 down, 1-RBD-up, 2-RBD-up and 3-RBD-up for  $S_{B.1.1.7}$  on the surface of lentiviral particles. To  
171 improve incorporation of S into lentiviral particles for EM, the  $S_{B.1.1.7}$  cytoplasmic tail was  
172 truncated (Figure 2C, D). The unliganded  $S_{B.1.1.7}$  displayed a similar number of 3-RBD-down, 1-  
173 RBD-up, and 2-RBD-up conformations, with the 3-RBD-up conformation rarely observed (Figure  
174 2F). CV3-1 clearly bound to the top of RBD with the RBD being oriented up (Figure 2C). Nearly  
175 all trimers with bound CV3-1 were in the RBD-up conformation (Figure 2E-G). Binding to RBD is  
176 consistent with previous data that demonstrated the ability of CV3-1 to competitively inhibit  
177 ACE2-S binding in vitro (Jennewein et al., 2021).

178 In contrast, CV3-25 bound towards the bottom of S2 and all trimer configurations were observed  
179 (Figure 2D, F, H, I). Compared to the unliganded S, CV3-25 binding redistributed the frequency  
180 of trimer configurations from the 3-RBD-down to the 1-, 2-, and 3-RBD-up configurations. To  
181 compare cryoET to smFRET data, we calculated the number of conformational states of  
182 individual RBD units, which is monitored by smFRET. This was done under the assumption that  
183 protomers neighboring to an RBD-up protomer are in an intermediate FRET state (Lu et al.,  
184 2020). Consequently, the 1- & 2-RBD-up not only feature 1 or 2 additional protomers in the  
185 RBD-up conformation, but also likely introduce a significant occupancy for structures exhibiting  
186 an intermediate FRET state ( $\sim 0.3$ ) (Figure 2E, F). While several caveats remain, such as the  
187 use of cytoplasmic tail-deleted S for EM (wt S for smFRET), the inability to see a structure  
188 corresponding to the intermediate FRET ( $\sim 0.3$ ), and as a consequence not knowing if both, left  
189 and right protomers neighboring a RBD-up, are in an intermediate FRET state, and the inability  
190 to assign a structure for the high-FRET state ( $\sim 0.8$ ), this is the first time that we can generate  
191 dynamic and static data for S on virus particles produced in the same cell type and assess them  
192 in parallel by smFRET and cryoET. Overall, there is qualitative agreement between cryoET and  
193 smFRET about how CV3-1 and CV3-25 alter the conformational landscape of S. Above  
194 mentioned caveats make quantitative comparisons currently impossible. smFRET may detect  
195 more dynamic features while cryoET may emphasize static features as previously discussed for  
196 the HIV-1 spike protein (Li et al., 2020).

197

## 198 **CV3-1 Binds to the 485-GFN-487 Loop of RBD**

199 To gain a higher resolution structure for CV3-1 bound to  $S_{B.1.1.7}$  we imposed C3 symmetry on a  
200 subtomogram averaged structure and determined a  $\sim 12$  Å map (Figure 3A, B, Figure S3A-C).  
201 The averaged cryoET structure showed three CV3-1 Fabs bound to the apex of the S trimer.  
202 Classification among these particles did not identify any subclass of spikes bound with only one  
203 or two CV3-1 Fabs (Figure 2D). Rigid-body fitting with a 3-RBD-down atomic model of  $S_{B.1.1.7}$   
204 (PDB: 7LWS (Gobeil et al., 2021)) left all three RBDs outside of cryoET density, while flexible  
205 fitting resulted in the conformational change from the RBD-down to the RBD-up state (Figure 3C,  
206 Video S1). We applied rigid fitting of the atomic structure of 1-up RBD (PDB: 7LWV (Gobeil et  
207 al., 2021)) to arrive at a model for CV3-1 Fab bound to  $S_{B.1.1.7}$  (Figure 3D). Compared to the  
208 footprint of receptor ACE2 on RBD (PDB: 7KJ4 (Xiao et al., 2021)), CV3-1 preferentially bound  
209 to the extending loop that contains the  $G^{485}F^{486}N^{487}$  residues (Figure 3D-E). We performed  
210 mutagenesis for the RBM and tested the abilities of CV3-1 and ACE2 to bind S mutants  
211 expressed on cells by flow cytometry. In agreement with the structural model, CV3-1 binding  
212 was preferentially affected by mutations in the 485-GFN-487 loop (Figure 3F, G). In contrast,  
213 ACE2 binding was sensitive to mutations within the RBM consistent with previous results  
214 (Greaney et al., 2021b; Starr et al., 2020). Importantly, all mutations within the 485-GFN-487  
215 loop affecting CV3-1 binding, also impaired ACE2 binding indicating that escape mutations at  
216 these positions would likely result in a high fitness cost for the virus.

217

## 218 **CV3-1 is a Potent Agonist Triggering S1 Shedding**

219 SARS-CoV-2 S proteins lacking the cytoplasmic tail are efficiently incorporated into lentiviral  
220 particles and form a dense array of spikes in the prefusion state (Dieterle et al., 2020; Ou et al.,  
221 2020; Schmidt et al., 2020; Yu et al.). In contrast, the virus particles incubated with CV3-1 lost  
222 most prefusion spikes and displayed S in the post-fusion state (Figure 2C). Quantification of  
223 spike numbers revealed that 83% of prefusion spikes, comparing to unliganded S, were lost  
224 after incubation with CV3-1 (Figure 4A). The structural characterization of CV3-1 bound to S  
225 shown above was performed with the remaining  $\sim 17\%$  of prefusion spikes. Given the loss of S1  
226 and activation of S2 into post-fusion conformation, we hypothesized that, besides competition  
227 with ACE2 (Jennewein et al., 2021), triggering S1 shedding likely contributed to SARS-CoV-2  
228 neutralization efficacy of CV3-1. Radioactive labeling followed by immunoprecipitation of cell



229 lysates and supernatant revealed that incubation with CV3-1 indeed released most S1 into the  
230 supernatant with its activity well exceeding that of ACE2 (Figure 4B). S lacking the furin-  
231 cleavage site was resistant to CV3-1- and ACE2-mediated shedding. The loss of S1 following  
232 incubation of CV3-1 was also observed by flow cytometry on cells expressing S (Figure 4C). S  
233 lacking the furin-cleavage site was again resistant to shedding induced by CV3-1. In contrast to  
234 CV3-1, CV3-25 induced little or no shedding in all assays (Figure 4A-D). Importantly, the ability  
235 of CV3-1 to neutralize the emerging variants B.1.1.7 (SARS-CoV-2  $\alpha$ ), B.1.351 ( $\beta$ ), P.1 ( $\gamma$ ),  
236 B.1.526 ( $\iota$ ), B.1.429 ( $\epsilon$ ) and B.1.617.2 ( $\delta$ ) (Figure 1B) paralleled the ability of CV3-1 to shed S1  
237 (Figure 4D). These data indicate that RBD-targeting antibodies can be potent agonists by  
238 prematurely activating S to impair virus entry.

239 As previously shown using SP cryoEM, the S trimer displays significant tilt relative to the viral  
240 membrane because of its highly flexible stalk region (Ke et al., 2020; Turoňová et al., 2020; Yao  
241 et al., 2020). Among the CV3-1-bound S that remained on the surface of virus particles, we  
242 sought to observe a change in the tilt angle of CV3-1-bound S. Quantification revealed a  
243 profound straightening of the S from an average tilt angle of  $\sim 57^\circ$  for the unliganded S to only  
244  $\sim 37^\circ$  (Figure S2A-C). Apparently, the ACE2-mimicking activation of RBD by CV3-1 leads to  
245 long-range structural effects involving S2, likely weakening the S1-S2 interface and resulting in  
246 the shedding of S1. When evaluating antibody binding cooperativity, the Hill coefficient for CV3-  
247 1 binding was found to be highly positive ( $h > 2$ ) (Figure S2D). This highly positive cooperativity  
248 may suggest that CV3-1 could access its epitope in the down conformation and bring the RBD  
249 to the up conformation to facilitate exposure of neighboring subunits, consistent with previous  
250 observations seen with other class 2 RBD Abs (Barnes et al., 2020a; Brouwer et al., 2020).

251

## 252 **CV3-25 Binds the Stem Helix of S2**

253 We employed a multipronged approach including cryoEM, cryoET, peptide competition, and X-  
254 ray crystallography to gain mechanistic insight into how CV3-25 achieves broad neutralization  
255 against emerging SARS-CoV-2 variants and other  $\beta$ -coronaviruses (Jennewein et al., 2021;  
256 Ullah et al., 2021). We first determined the cryo-EM structure of the SARS-CoV-2 spike  
257 (HexaPro, prefusion-stabilized)(Hsieh et al., 2020) in the presence of CV3-25 Fab at an overall  
258 resolution of  $\sim 3.5 \text{ \AA}$  (Figure S4A-D). Map density analysis indicated the 1-RBD-up state was the  
259 dominant spike conformation with a decreased local resolution in this region (Figure S4G). The  
260 density corresponding to the C-terminal stem region was less defined with a local resolution

261 lower than 7 Å, but there was additional density for CV3-25 in the C-terminal stem region. 3D  
262 classification of the Cryo-EM data barely improved the local density suggesting incomplete Fab  
263 saturation for all available binding sites. Nevertheless, the data suggested that CV3-25 binds to  
264 the lower stem of the soluble HexaPro S.

265 Given that soluble S trimers are truncated, lack the transmembrane region, and feature a T4  
266 foldon, we reasoned that cryoET of native spike proteins embedded into virus particles could  
267 provide more insight into CV3-25's epitope. We used cryoET followed by subtomogram  
268 averaging of ~7000 prefusion spikes to examine CV3-25 binding to S<sub>B.1.1.7</sub>. Subclassification  
269 revealed that about half of S had two CV3-25 Fabs bound to the stem of S2, and the other half  
270 had only one CV3-25 Fab bound (Figure S5). We further aligned the subtomograms with a  
271 mask for two CV3-25 Fabs to arrive at ~10 Å resolution map. This structure places the CV3-25  
272 epitope within the connecting domain (CD) of the stem helix (Figure 5A, B, F). Density for the  
273 second Fab was weaker since ~half of spikes had only one CV3-25 Fab bound.

274 As discussed above, classification of the spike structures into 3-RBD-down, 1-, 2- or 3-RBD-up  
275 revealed an overall shift towards activation for CV3-25 bound S (Figure 2E, F). Averaged  
276 structures focusing on RBD showed 3 bound CV3-25 Fabs in 1-RBD-up and 2-RBD-up spikes  
277 while only 2 CV3-25 Fabs bound to 3-RBD-down and 3-RBD-up average structures (Figure  
278 S2E). These structures confirmed that CV3-25 binds to all prefusion spike configurations  
279 consistent with previous biochemical results as well as smFRET (Lu et al., 2020). Any observed  
280 asymmetry was not due to the tilt of the spike as the average tilt barely changed upon binding of  
281 CV3-25 (Figures S2A-C), consistent with a neutral antibody binding cooperativity (Hill coefficient  
282  $\approx 1$ ) (Figure S2D).

283

#### 284 **Peptide Screening Maps CV3-25 Epitope to the Spike Residues 1149-1167**

285 To gain atomic insight, we screened S2 peptides for binding to CV3-25 with the goal of isolating  
286 peptides suitable for X-ray crystallography. The first insight that CV3-25 binds a linear peptide  
287 was gained from Western blotting following SDS-PAGE. CV3-25 was clearly able to bind to S2  
288 as well as the S2-containing S precursor under fully denaturing conditions and independently of  
289 N-linked glycans (Figure S6A, B). We then tested a set of peptides (15-mer) spanning the entire  
290 S2 subunit including the connecting domain and performed two rounds of ELISA to identify  
291 peptides capable of binding CV3-25 (Figure 5C-E). The identified peptides (#288 and #289)

292 were also tested in competition assays and the binding was quantified using SPR assays  
293 (Figures S6C, D). Peptide #289 was the most potent in all assays with a  $K_D$  of 29 nM and  
294 efficiently blocked CV3-25 neutralization (Figure S6E, 6F). Peptides #288 and #289 mapped to  
295 the S2 stem helix region (Figure 5F), consistent with the CV3-25 binding region indicated in the  
296 cryoET averaged structure.

297

### 298 **CV3-25 Binds to a Conserved S2 Peptide in a Bent Conformation**

299 To obtain molecular insight into CV3-25 interaction with the S2 stem peptide, we determined the  
300 co-crystal structure of CV3-25 Fab with a synthetic peptide spanning residues 1140-1165  
301 (26mer) of SARS-CoV-2 spike. The structure was solved to 2.1 Å resolution and allowed us to  
302 resolve 20 of the 26 residues in relation to the Fab paratope (Figure 6, Figure S7, Table S2).  
303 When bound to CV3-25 Fab, the peptide adopted a bent conformation with the N-terminal half  
304 of the peptide (residues 1146-DSFKEELDKYFK-1157) forming an  $\alpha$ -helix and the C-terminal  
305 half a random coil (residues 1158-NHTSPDVD-1165) with a bend of  $\sim 95^\circ$  between the two  
306 (Figure 6A). This bent conformation fit well with the long complementary determining region  
307 (CDR) H3 loop of the Fab (16 aa long) that is stabilized by extensive H-bonds, salt bridges and  
308 intra-molecular  $\pi$ - $\pi$  stacking between residues Y<sup>1155</sup> and H<sup>1159</sup> of the peptide (Figure 6B-D and  
309 Figure S7). A rare CDR H3 disulfide bond between residues C<sup>99</sup> and C<sup>100D</sup> also stabilizes the  
310 CDR H3 hairpin that tightly associates with the S2 peptide random coil. Interestingly, the S2  
311 stem region recognized by CV3-25 is conserved among the B lineage of  $\beta$ -coronaviruses  
312 (Figure 6F), with several key epitope residues also conserved among A, C, and D lineages. This  
313 suggests that CV3-25 displays cross-reactivity with coronaviruses beyond the B-lineage.  
314 Furthermore, although crystallographic analyses confirm residues 1149 to 1165 of the S2 stem  
315 to interact with CV3-25 (Figure 6D), SPR analyses using S2 peptide truncations indicate that  
316 CV3-25 may also interact with residues following D<sup>1165</sup>, the terminal S2 residue used in  
317 crystallographic studies. These contacts could be mediated by the light chain of CV3-25 that is  
318 positioned to accommodate the C-terminal extension of the peptide (Figure 6A). Of note, the S2  
319 recognition site and angle of approach of CV3-25 differentiate it from B6, the only reported anti-  
320 MERS-CoV S2 NAb as well as CC40.8 and S2P6, the only two known human anti-SARS-CoV-2  
321 S2 NAbS (PDBs not available) (Pinto et al., 2021; Sauer et al., 2021; Zhou et al., 2021) (Figure  
322 6G). B6, CC40.8 and S2P6 mainly interact with the N-terminal stem  $\alpha$ -helix and barely contact  
323 with C-terminal loop as recognized and reconfigured by CV3-25, indicating that CV3-25 is the

324 first representative of a new class of anti-S2 antibodies with broad reactivity against  $\beta$ -  
325 coronaviruses.

326 To conceptualize the X-ray structure of the peptide bound to CV3-25 in the context of the S  
327 trimer, we superimposed two CV3-25 Fabs structures to the stem helix of the S trimer (PDB:  
328 6XR8 (Cai et al., 2020) (Figure 7A). Direct superposition results in a clash of the Fabs and a  
329 mismatch of the Fab with the density map observed in the cryoET structure (Figure 7A). The  
330 random coil of the stem helix bound with CV3-25 points toward the center of the stem helix  
331 bundle producing a clash when two coils occupy the center region (Figure 7A). By performing  
332 flexible fitting we arrived at a structure for two CV3-25 Fabs bound to the S trimer, in which the  
333 helix and flexible turn are almost maintained at the original position for the first Fab (rotated by  
334 about 13°), and are shifted outward and rotated by about 20° for the second Fab (Figure 7B,  
335 Video S2). The increasing need for dislocation and rotation likely explains that binding additional  
336 Fabs comes at an energy cost resulting in an asymmetric arrangement of one or two CV3-25  
337 Fabs bound to S.

338 Superimposition of the CV3-25/peptide structure to post-fusion S (PDB: 6XRA) (Cai et al., 2020)  
339 indicates that the light chain of CV3-25 would clash with HR1 of the adjacent protomer (Figure  
340 7C). Furthermore, in post-fusion conformation, the stem helix unwinds a full turn, resulting in a  
341 clash between the glycan at ASN1158 and the heavy chain of CV3-25 (Figure 7C). These  
342 observations suggest that the structure of CV3-25 bound to S is incompatible with the post-  
343 fusion conformation of S. Indeed, we observed potent inhibition of membrane fusion by CV3-25  
344 in a virus-to-cell fusion assay that uses nano-luciferase complementation (Figure 7D, E). As  
345 observed for CV3-1, CV3-25 also exhibits potent inhibitor function.

346

## 347 **Discussion**

348 Here we describe the structures and mode of action of two potent anti-SARS-CoV-2 Spike  
349 antibodies. Both antibodies remained effective against emerging variants of concern and  
350 therefore were prime candidates to elucidate mode of action and identify epitopes with pan-  
351 coronavirus activity. CV3-1 stabilized the receptor-binding domain (RBD) in the “RBD-up”  
352 conformation and triggered potent shedding of S1. The ability of CV3-1 to neutralize variants of  
353 concern correlated with its ability to shed S1 and inactivate S. In contrast, CV3-25 bound to a  
354 highly conserved epitope in the stem helix in the S2 subunit and inhibited membrane fusion. We

355 believe that both epitopes of these two antibodies are of interest for passive and active  
356 immunization strategies against emerging variants.

357 The cryoET structure of CV3-1 to S suggested binding to the 485-GFN-487 loop of RBD, an  
358 interpretation confirmed by mutagenesis. While mutations in these positions abrogate the  
359 binding of CV3-1 to S, they are rarely observed among circulating strains, suggesting that they  
360 are associated with a high fitness cost likely due to their importance in ACE2 interaction.  
361 Interestingly, CV3-1 exhibited potent agonist features indicating that it hits an allosteric site that  
362 is critical for the ability of ACE2 to induce conformational changes that lead to fusion. Consistent  
363 with this observation, CV3-1 induced potent shedding and the straightening of spikes indicative  
364 of allosteric signaling from the RBD all the way to the S2 stem region. This allosteric signaling  
365 likely weakens the S1-S2 interface leading to the observed shedding of S1. While CV3-1 is  
366 specific against SARS-CoV-2, it remained active against all tested variants of concern and  
367 variants of interest and protected K18-hACE2 transgenic mice from lethal challenges using the  
368 B.1.351 variant of concern. The potent agonist features within the ACE2 binding site may also  
369 open an opportunity for small molecule inhibitors that prematurely activate S not unlike CD4  
370 mimetics in the case of HIV-1 envelope (Laumaea et al., 2020).

371 The structures of CV3-25 with a S peptide and intact S on the surface of virus particles revealed  
372 that it binds to the S2 stem in a region conserved among  $\beta$ -coronaviruses. Unlike other recently  
373 reported anti-S2 antibodies, CC40.8 and S2P6, which mainly recognize the stem helix and  
374 barely interact with the hinge region (Pinto et al., 2021; Zhou et al., 2021), CV3-25 also engages  
375 the hinge peptide known to be responsible for the tilting of spikes with respect to the membrane  
376 (Ke et al., 2020; Turoňová et al., 2020). This added ability of CV3-25 likely offers an advantage  
377 in capturing an easily accessible epitope in the hinge region and subsequently progressively  
378 twisting the helix to establish contact with the  $\alpha$ -helical region of the stem. The relative  
379 conservation of this hinge is likely related to the observed allosteric communication from the  
380 RBD all the way down to S2. The post-fusion conformation of S forms a six-helix bundle  
381 structure when pulling two membranes together for fusion. This conformational change probably  
382 involves unwinding of the stem helix and loop to helix transition for the loose loop at the lower  
383 end. CV3-25 binding at both helix region and the random coil at the stem helix likely interrupts  
384 this S2 refolding, thus inhibiting membrane fusion.

385 One of the most exciting aspects of CV3-25 is its linear peptide epitope, which offers easy  
386 access to exploration of its potential as an immunogen. As the structure of the native S on the  
387 surface of virus particles revealed, access of CV3-25 is hindered by the need for rotation of the

388 stem helix. However, such conformational readjustment is not needed for an immunogen. As  
389 such, eliciting antibodies targeting this S2 stem epitope using peptide or scaffold-presented  
390 peptide immunogens is predicted to be easier than when the entire spike trimer is the antigen.  
391 The potential of the CV3-25 epitope described herein should be explored as a candidate  
392 immunogen for vaccines that could be effective against all emerging variants and possibly  
393 exhibit pan-coronavirus efficacy.

394

### 395 **Acknowledgement**

396 We thank Dr. Shenping Wu at Yale CryoEM facility for her technical assistance, and Dr. Zhuan  
397 Qin at University of Oxford for discussion on image processing. The authors thank the  
398 CRCHUM Animal Facility, BSL3 and Flow Cytometry Platforms for their technical assistance.  
399 We thank Dr. Stefan Pöhlmann and Dr. Markus Hoffmann (Georg-August University) for the  
400 plasmids coding for SARS-CoV-2 and Daniel Kaufmann for S2 15-mer peptides. The authors  
401 are grateful to MediMabs for providing their rabbit immunization protocol used to generate the  
402 anti-SARS-CoV-2 RBD polyclonal antibody. CV3-1 and CV3-25 antibodies were produced using  
403 the pTT vector kindly provided by the Canada Research Council. Crystallographic data were  
404 collected at the Stanford Synchrotron Radiation Light Source, SLAC National Accelerator  
405 Laboratory, which is supported by the U.S. Department of Energy, Office of Science, Office of  
406 Basic Energy Sciences, under contract number DE-AC02-76SF00515. The SSRL Structural  
407 Molecular Biology Program is supported by the DOE Office of Biological and Environmental  
408 Research and by the National Institutes of Health, National Institute of General Medical  
409 Sciences. This work was supported by a CIHR operating grant Pandemic and Health  
410 Emergencies Research/Project #465175 to M.P., W.M. and A.F., a NIH R01 AI163395-01 to  
411 W.M., by le Ministère de l'Économie et de l'Innovation (MEI) du Québec, Programme de soutien  
412 aux organismes de recherche et d'innovation to A.F., the Fondation du CHUM, a CIHR  
413 foundation grant #352417 to A.F., CIHR stream 1 and 2 for SARS-CoV-2 Variant Research to  
414 A.F. and M.C., an Exceptional Fund COVID-19 from the Canada Foundation for Innovation (CFI)  
415 #41027 to A.F., the Sentinelle COVID Quebec network led by the Laboratoire de Santé  
416 Publique du Québec (LSPQ) in collaboration with Fonds de Recherche du Québec-Santé  
417 (FRQS) and Genome Canada – Génome Québec, and by the Ministère de la Santé et des  
418 Services Sociaux (MSSS) and MEI to A.F. A.F. and M.C. are recipients of Canada Research  
419 Chairs on Retroviral Entry no. RCHS0235 950-232424 and CRC in Molecular Virology and  
420 Antiviral Therapeutics, respectively. J.P. and S.P.A. are supported by CIHR fellowships, M.W.G.

421 by the Gruber foundation, and R.G. by a MITACS Accélération postdoctoral fellowship. The  
422 funders had no role in study design, data collection and analysis, decision to publish, or  
423 preparation of the manuscript.

424

425 **Disclaimer**

426 The views expressed in this presentation are those of the authors and do not reflect the official  
427 policy or position of the Uniformed Services University, U.S. Army, the Department of Defense,  
428 or the U.S. Government.

429

430

431 **References**

- 432 Anand, S.P., Chen, Y., Prévost, J., Gasser, R., Beaudoin-Bussièrès, G., Abrams, C.F., Pazgier,  
433 M., and Finzi, A. (2020). Interaction of Human ACE2 to Membrane-Bound SARS-CoV-1 and  
434 SARS-CoV-2 S Glycoproteins. *Viruses* 12, 1104.
- 435 Anthony, S.J., Gilardi, K., Menachery, V.D., Goldstein, T., Ssebide, B., Mbabazi, R., Navarrete-  
436 Macias, I., Liang, E., Wells, H., Hicks, A., et al. Further Evidence for Bats as the Evolutionary  
437 Source of Middle East Respiratory Syndrome Coronavirus. *mBio* 8, e00373-00317.
- 438 Baden, L.R., El Sahly, H.M., Essink, B., Kotloff, K., Frey, S., Novak, R., Diemert, D., Spector,  
439 S.A., Roupheal, N., Creech, C.B., et al. (2020). Efficacy and Safety of the mRNA-1273 SARS-  
440 CoV-2 Vaccine. *New England Journal of Medicine* 384, 403-416.
- 441 Barad, B.A., Echols, N., Wang, R.Y.-R., Cheng, Y., DiMaio, F., Adams, P.D., and Fraser, J.S.  
442 (2015). EMRinger: side chain-directed model and map validation for 3D cryo-electron  
443 microscopy. *Nature Methods* 12, 943-946.
- 444 Barnes, C.O., Jette, C.A., Abernathy, M.E., Dam, K.-M.A., Esswein, S.R., Gristick, H.B.,  
445 Malyutin, A.G., Sharaf, N.G., Huey-Tubman, K.E., Lee, Y.E., et al. (2020a). SARS-CoV-2  
446 neutralizing antibody structures inform therapeutic strategies. *Nature* 588, 682-687.
- 447 Barnes, C.O., West, A.P., Jr., Huey-Tubman, K.E., Hoffmann, M.A.G., Sharaf, N.G., Hoffman,  
448 P.R., Koranda, N., Gristick, H.B., Gaebler, C., Muecksch, F., et al. (2020b). Structures of  
449 Human Antibodies Bound to SARS-CoV-2 Spike Reveal Common Epitopes and Recurrent  
450 Features of Antibodies. *Cell* 182, 828-842.e816.
- 451 Beaudoin-Bussièrès, G., Laumaea, A., Anand, S.P., Prévost, J., Gasser, R., Goyette, G.,  
452 Medjahed, H., Perreault, J., Tremblay, T., Lewin, A., et al. (2020). Decline of Humoral  
453 Responses against SARS-CoV-2 Spike in Convalescent Individuals. *mBio* 11, e02590-02520.
- 454 Brouwer, P.J.M., Caniels, T.G., van der Straten, K., Snitselaar, J.L., Aldon, Y., Bangaru, S.,  
455 Torres, J.L., Okba, N.M.A., Claireaux, M., Kerster, G., et al. (2020). Potent neutralizing  
456 antibodies from COVID-19 patients define multiple targets of vulnerability. *Science* 369, 643-650.
- 457 Brunger, A.T. (1997). Free R value: Cross-validation in crystallography. In *Methods in*  
458 *Enzymology* (Academic Press), pp. 366-396.
- 459 Burnley, T., Palmer, C.M., and Winn, M. (2017). Recent developments in the CCP-EM software  
460 suite. *Acta Crystallographica Section D* 73, 469-477.



- 461 Cai, Y., Zhang, J., Xiao, T., Peng, H., Sterling, S.M., Walsh, R.M., Rawson, S., Rits-Volloch, S.,  
462 and Chen, B. (2020). Distinct conformational states of SARS-CoV-2 spike protein. *Science* 369,  
463 1586.
- 464 Campbell, F., Archer, B., Laurenson-Schafer, H., Jinnai, Y., Konings, F., Batra, N., Pavlin, B.,  
465 Vandemaele, K., Van Kerkhove, M.D., Jombart, T., et al. (2021). Increased transmissibility and  
466 global spread of SARS-CoV-2 variants of concern as at June 2021. *Eurosurveillance* 26,  
467 2100509.
- 468 Chen, V.B., Arendall, W.B., III, Headd, J.J., Keedy, D.A., Immormino, R.M., Kapral, G.J., Murray,  
469 L.W., Richardson, J.S., and Richardson, D.C. (2010). MolProbity: all-atom structure validation  
470 for macromolecular crystallography. *Acta Crystallographica Section D* 66, 12-21.
- 471 Dieterle, M.E., Haslwanter, D., Bortz, R.H., Wirchnianski, A.S., Lasso, G., Vergnolle, O., Abbasi,  
472 S.A., Fels, J.M., Laudermitch, E., Florez, C., et al. (2020). A Replication-Competent Vesicular  
473 Stomatitis Virus for Studies of SARS-CoV-2 Spike-Mediated Cell Entry and Its Inhibition. *Cell*  
474 *Host & Microbe* 28, 486-496.e486.
- 475 Dong, E., Du, H., and Gardner, L. (2020). An interactive web-based dashboard to track COVID-  
476 19 in real time. *The Lancet Infectious Diseases* 20, 533-534.
- 477 Dunbar, J., Krawczyk, K., Leem, J., Marks, C., Nowak, J., Regep, C., Georges, G., Kelm, S.,  
478 Popovic, B., and Deane, C.M. (2016). SAbPred: a structure-based antibody prediction server.  
479 *Nucleic Acids Res* 44, W474-478.
- 480 Emsley, P., and Cowtan, K. (2004). Coot: model-building tools for molecular graphics. *Acta*  
481 *Crystallogr D Biol Crystallogr* 60, 2126-2132.
- 482 Folegatti, P.M., Ewer, K.J., Aley, P.K., Angus, B., Becker, S., Belij-Rammerstorfer, S., Bellamy,  
483 D., Bibi, S., Bittaye, M., Clutterbuck, E.A., et al. (2020). Safety and immunogenicity of the  
484 ChAdOx1 nCoV-19 vaccine against SARS-CoV-2: a preliminary report of a phase 1/2, single-  
485 blind, randomised controlled trial. *The Lancet* 396, 467-478.
- 486 Ge, X.-Y., Li, J.-L., Yang, X.-L., Chmura, A.A., Zhu, G., Epstein, J.H., Mazet, J.K., Hu, B., Zhang,  
487 W., Peng, C., et al. (2013). Isolation and characterization of a bat SARS-like coronavirus that  
488 uses the ACE2 receptor. *Nature* 503, 535-538.

- 489 Gobeil, S.M.C., Janowska, K., McDowell, S., Mansouri, K., Parks, R., Stalls, V., Kopp, M.F.,  
490 Manne, K., Li, D., Wiehe, K., et al. (2021). Effect of natural mutations of SARS-CoV-2 on spike  
491 structure, conformation, and antigenicity. *Science*, eabi6226.
- 492 Goddard, T.D., Huang, C.C., Meng, E.C., Pettersen, E.F., Couch, G.S., Morris, J.H., and Ferrin,  
493 T.E. (2018). UCSF ChimeraX: Meeting modern challenges in visualization and analysis. *Protein*  
494 *Science* 27, 14-25.
- 495 Greaney, A.J., Loes, A.N., Crawford, K.H.D., Starr, T.N., Malone, K.D., Chu, H.Y., and Bloom,  
496 J.D. (2021a). Comprehensive mapping of mutations in the SARS-CoV-2 receptor-binding  
497 domain that affect recognition by polyclonal human plasma antibodies. *Cell Host & Microbe* 29,  
498 463-476.e466.
- 499 Greaney, A.J., Starr, T.N., Gilchuk, P., Zost, S.J., Binshtein, E., Loes, A.N., Hilton, S.K.,  
500 Huddleston, J., Eguia, R., Crawford, K.H.D., et al. (2021b). Complete Mapping of Mutations to  
501 the SARS-CoV-2 Spike Receptor-Binding Domain that Escape Antibody Recognition. *Cell Host*  
502 *& Microbe* 29, 44-57.e49.
- 503 Grifoni, A., Sidney, J., Zhang, Y., Scheuermann, R.H., Peters, B., and Sette, A. (2020). A  
504 Sequence Homology and Bioinformatic Approach Can Predict Candidate Targets for Immune  
505 Responses to SARS-CoV-2. *Cell Host & Microbe* 27, 671-680.e672.
- 506 Hagen, W.J.H., Wan, W., and Briggs, J.A.G. (2017). Implementation of a cryo-electron  
507 tomography tilt-scheme optimized for high resolution subtomogram averaging. *Journal of*  
508 *Structural Biology* 197, 191-198.
- 509 Hoffmann, M., Arora, P., Groß, R., Seidel, A., Hörnich, B.F., Hahn, A.S., Krüger, N., Graichen,  
510 L., Hofmann-Winkler, H., Kempf, A., et al. (2021). SARS-CoV-2 variants B.1.351 and P.1  
511 escape from neutralizing antibodies. *Cell* 184, 2384-2393.e2312.
- 512 Hoffmann, M., Kleine-Weber, H., Schroeder, S., Krüger, N., Herrler, T., Erichsen, S., Schiergens,  
513 T.S., Herrler, G., Wu, N.-H., Nitsche, A., et al. (2020). SARS-CoV-2 Cell Entry Depends on  
514 ACE2 and TMPRSS2 and Is Blocked by a Clinically Proven Protease Inhibitor. *Cell* 181, 271-  
515 280.e278.
- 516 Hsieh, C.-L., Goldsmith, J.A., Schaub, J.M., DiVenere, A.M., Kuo, H.-C., Javanmardi, K., Le,  
517 K.C., Wrapp, D., Lee, A.G., Liu, Y., et al. (2020). Structure-based design of prefusion-stabilized  
518 SARS-CoV-2 spikes. *Science* 369, 1501.

519 Jennewein, M.F., MacCamy, A.J., Akins, N.R., Feng, J., Homad, L.J., Hurlburt, N.K., Seydoux,  
520 E., Wan, Y.-H., Stuart, A.B., Edara, V.V., et al. (2021). Isolation and characterization of cross-  
521 neutralizing coronavirus antibodies from COVID-19+ subjects. *Cell Reports* 36, 109353.

522 Ju, B., Zhang, Q., Ge, J., Wang, R., Sun, J., Ge, X., Yu, J., Shan, S., Zhou, B., Song, S., et al.  
523 (2020). Human neutralizing antibodies elicited by SARS-CoV-2 infection. *Nature* 584, 115-119.

524 Karplus, P.A., and Diederichs, K. (2012). Linking Crystallographic Model and Data Quality.  
525 *Science* 336, 1030.

526 Ke, Z., Oton, J., Qu, K., Cortese, M., Zila, V., McKeane, L., Nakane, T., Zivanov, J., Neufeldt,  
527 C.J., Cerikan, B., et al. (2020). Structures and distributions of SARS-CoV-2 spike proteins on  
528 intact virions. *Nature*.

529 Krissinel, E., and Henrick, K. (2007). Inference of macromolecular assemblies from crystalline  
530 state. *J Mol Biol* 372, 774-797.

531 Lan, J., Ge, J., Yu, J., Shan, S., Zhou, H., Fan, S., Zhang, Q., Shi, X., Wang, Q., Zhang, L., et al.  
532 (2020). Structure of the SARS-CoV-2 spike receptor-binding domain bound to the ACE2  
533 receptor. *Nature* 581, 215-220.

534 Laumaea, A., Smith, A.B., III, Sodroski, J., and Finzi, A. (2020). Opening the HIV envelope:  
535 potential of CD4 mimics as multifunctional HIV entry inhibitors. *Current Opinion in HIV and AIDS*  
536 15.

537 Letko, M., Marzi, A., and Munster, V. (2020). Functional assessment of cell entry and receptor  
538 usage for SARS-CoV-2 and other lineage B betacoronaviruses. *Nature Microbiology* 5, 562-569.

539 Li, W., Moore, M.J., Vasilieva, N., Sui, J., Wong, S.K., Berne, M.A., Somasundaran, M., Sullivan,  
540 J.L., Luzuriaga, K., Greenough, T.C., et al. (2003). Angiotensin-converting enzyme 2 is a  
541 functional receptor for the SARS coronavirus. *Nature* 426, 450-454.

542 Li, Z., Li, W., Lu, M., Bess, J., Chao, C.W., Gorman, J., Terry, D.S., Zhang, B., Zhou, T.,  
543 Blanchard, S.C., et al. (2020). Subnanometer structures of HIV-1 envelope trimers on aldrithiol-  
544 2-inactivated virus particles. *Nature Structural & Molecular Biology* 27, 726-734.

545 Liebschner, D., Afonine, P.V., Baker, M.L., Bunkoczi, G., Chen, V.B., Croll, T.I., Hintze, B.,  
546 Hung, L.W., Jain, S., McCoy, A.J., et al. (2019). Macromolecular structure determination using  
547 X-rays, neutrons and electrons: recent developments in Phenix. *Acta Crystallogr D Struct Biol*  
548 75, 861-877.

- 549 Liu, L., Wang, P., Nair, M.S., Yu, J., Rapp, M., Wang, Q., Luo, Y., Chan, J.F.W., Sahi, V.,  
550 Figueroa, A., et al. (2020). Potent neutralizing antibodies against multiple epitopes on SARS-  
551 CoV-2 spike. *Nature* 584, 450-456.
- 552 Liu, Z., VanBlargan, L.A., Bloyet, L.-M., Rothlauf, P.W., Chen, R.E., Stumpf, S., Zhao, H., Errico,  
553 J.M., Theel, E.S., Liebeskind, M.J., et al. (2021). Identification of SARS-CoV-2 spike mutations  
554 that attenuate monoclonal and serum antibody neutralization. *Cell Host & Microbe* 29, 477-  
555 488.e474.
- 556 Logunov, D.Y., Dolzhikova, I.V., Shcheblyakov, D.V., Tukhvatulin, A.I., Zubkova, O.V.,  
557 Dzharullaeva, A.S., Kovyrshina, A.V., Lubenets, N.L., Grousova, D.M., Erokhova, A.S., et al.  
558 (2021). Safety and efficacy of an rAd26 and rAd5 vector-based heterologous prime-boost  
559 COVID-19 vaccine: an interim analysis of a randomised controlled phase 3 trial in Russia. *The*  
560 *Lancet* 397, 671-681.
- 561 Lopéz-Blanco, J.R., and Chacón, P. (2013). iMODFIT: Efficient and robust flexible fitting based  
562 on vibrational analysis in internal coordinates. *Journal of Structural Biology* 184, 261-270.
- 563 Lu, M., Uchil, P.D., Li, W., Zheng, D., Terry, D.S., Gorman, J., Shi, W., Zhang, B., Zhou, T.,  
564 Ding, S., et al. (2020). Real-Time Conformational Dynamics of SARS-CoV-2 Spikes on Virus  
565 Particles. *Cell Host & Microbe* 28, 880-891.e888.
- 566 Ma, Z., Li, P., Ji, Y., Ikram, A., and Pan, Q. (2020). Cross-reactivity towards SARS-CoV-2: the  
567 potential role of low-pathogenic human coronaviruses. *The Lancet Microbe* 1, e151.
- 568 Mastronarde, D.N. (2005). Automated electron microscope tomography using robust prediction  
569 of specimen movements. *Journal of Structural Biology* 152, 36-51.
- 570 Mastronarde, D.N., and Held, S.R. (2017). Automated tilt series alignment and tomographic  
571 reconstruction in IMOD. *Journal of Structural Biology* 197, 102-113.
- 572 McCallum, M., De Marco, A., Lempp, F.A., Tortorici, M.A., Pinto, D., Walls, A.C., Beltramello, M.,  
573 Chen, A., Liu, Z., Zatta, F., et al. (2021). N-terminal domain antigenic mapping reveals a site of  
574 vulnerability for SARS-CoV-2. *Cell* 184, 2332-2347.e2316.
- 575 Menachery, V.D., Yount, B.L., Debbink, K., Agnihothram, S., Gralinski, L.E., Plante, J.A.,  
576 Graham, R.L., Scobey, T., Ge, X.-Y., Donaldson, E.F., et al. (2015). A SARS-like cluster of  
577 circulating bat coronaviruses shows potential for human emergence. *Nature Medicine* 21, 1508-  
578 1513.

579 Menachery, V.D., Yount, B.L., Sims, A.C., Debbink, K., Agnihothram, S.S., Gralinski, L.E.,  
580 Graham, R.L., Scobey, T., Plante, J.A., Royal, S.R., et al. (2016). SARS-like WIV1-CoV poised  
581 for human emergence. *Proceedings of the National Academy of Sciences* 113, 3048.

582 Minor, W., Cymborowski, M., Otwinowski, Z., and Chruszcz, M. (2006). HKL-3000: the  
583 integration of data reduction and structure solution--from diffraction images to an initial model in  
584 minutes. *Acta Crystallogr D Biol Crystallogr* 62, 859-866.

585 Montefiori, D.C., and Acharya, P. (2021). SnapShot: SARS-CoV-2 antibodies. *Cell Host &*  
586 *Microbe* 29, 1162-1162.e1161.

587 Ng, K.W., Faulkner, N., Cornish, G.H., Rosa, A., Harvey, R., Hussain, S., Ulferts, R., Earl, C.,  
588 Wrobel, A.G., Benton, D.J., et al. (2020). Preexisting and de novo humoral immunity to SARS-  
589 CoV-2 in humans. *Science* 370, 1339.

590 Nguyen, H.T., Zhang, S., Wang, Q., Anang, S., Wang, J., Ding, H., Kappes, J.C., Sodroski, J.,  
591 and Dutch, R.E. (2021). Spike Glycoprotein and Host Cell Determinants of SARS-CoV-2 Entry  
592 and Cytopathic Effects. *Journal of Virology* 95, e02304-02320.

593 Ou, X., Liu, Y., Lei, X., Li, P., Mi, D., Ren, L., Guo, L., Guo, R., Chen, T., Hu, J., et al. (2020).  
594 Characterization of spike glycoprotein of SARS-CoV-2 on virus entry and its immune cross-  
595 reactivity with SARS-CoV. *Nature Communications* 11, 1620.

596 Pettersen, E.F., Goddard, T.D., Huang, C.C., Couch, G.S., Greenblatt, D.M., Meng, E.C., and  
597 Ferrin, T.E. (2004). UCSF Chimera—A visualization system for exploratory research and  
598 analysis. *Journal of Computational Chemistry* 25, 1605-1612.

599 Pettersen, E.F., Goddard, T.D., Huang, C.C., Meng, E.C., Couch, G.S., Croll, T.I., Morris, J.H.,  
600 and Ferrin, T.E. (2021). UCSF ChimeraX: Structure visualization for researchers, educators,  
601 and developers. *Protein Science* 30, 70-82.

602 Pinto, D., Sauer, M.M., Czudnochowski, N., Low, J.S., Tortorici, M.A., Housley, M.P., Noack, J.,  
603 Walls, A.C., Bowen, J.E., Guarino, B., et al. (2021). A human antibody that broadly neutralizes  
604 betacoronaviruses protects against SARS-CoV-2 by blocking the fusion machinery. *bioRxiv*,  
605 2021.2005.2009.442808.

606 Planas, D., Bruel, T., Grzelak, L., Guivel-Benhassine, F., Staropoli, I., Porrot, F., Planchais, C.,  
607 Buchrieser, J., Rajah, M.M., Bishop, E., et al. (2021a). Sensitivity of infectious SARS-CoV-2  
608 B.1.1.7 and B.1.351 variants to neutralizing antibodies. *Nature Medicine* 27, 917-924.

- 609 Planas, D., Veyer, D., Baidaliuk, A., Staropoli, I., Guivel-Benhassine, F., Rajah, M.M., Planchais,  
610 C., Porrot, F., Robillard, N., Puech, J., et al. (2021b). Reduced sensitivity of SARS-CoV-2  
611 variant Delta to antibody neutralization. *Nature*.
- 612 Polack, F.P., Thomas, S.J., Kitchin, N., Absalon, J., Gurtman, A., Lockhart, S., Perez, J.L.,  
613 Pérez Marc, G., Moreira, E.D., Zerbini, C., et al. (2020). Safety and Efficacy of the BNT162b2  
614 mRNA Covid-19 Vaccine. *New England Journal of Medicine* 383, 2603-2615.
- 615 Popov, A.N., and Bourenkov, G.P. (2003). Choice of data-collection parameters based on  
616 statistic modelling. *Acta Crystallogr D Biol Crystallogr* 59, 1145-1153.
- 617 Prévost, J., and Finzi, A. (2021). The great escape? SARS-CoV-2 variants evading neutralizing  
618 responses. *Cell Host & Microbe* 29, 322-324.
- 619 Prévost, J., Gasser, R., Beaudoin-Bussièrès, G., Richard, J., Duerr, R., Laumaea, A., Anand,  
620 S.P., Goyette, G., Benlarbi, M., Ding, S., et al. (2020). Cross-Sectional Evaluation of Humoral  
621 Responses against SARS-CoV-2 Spike. *Cell Reports Medicine* 1, 100126.
- 622 Punjani, A., Rubinstein, J.L., Fleet, D.J., and Brubaker, M.A. (2017). cryoSPARC: algorithms for  
623 rapid unsupervised cryo-EM structure determination. *Nature Methods* 14, 290-296.
- 624 Rubinstein, J.L., and Brubaker, M.A. (2015). Alignment of cryo-EM movies of individual particles  
625 by optimization of image translations. *Journal of Structural Biology* 192, 188-195.
- 626 Sadoff, J., Gray, G., Vandebosch, A., Cárdenas, V., Shukarev, G., Grinsztejn, B., Goepfert, P.A.,  
627 Truyers, C., Fennema, H., Spiessens, B., et al. (2021a). Safety and Efficacy of Single-Dose  
628 Ad26.COVS.2 Vaccine against Covid-19. *New England Journal of Medicine* 384, 2187-2201.
- 629 Sadoff, J., Le Gars, M., Shukarev, G., Heerwegh, D., Truyers, C., de Groot, A.M., Stoop, J.,  
630 Tete, S., Van Damme, W., Leroux-Roels, I., et al. (2021b). Interim Results of a Phase 1–2a Trial  
631 of Ad26.COVS.2 Covid-19 Vaccine. *New England Journal of Medicine*.
- 632 Sauer, M.M., Tortorici, M.A., Park, Y.-J., Walls, A.C., Homad, L., Acton, O.J., Bowen, J.E.,  
633 Wang, C., Xiong, X., de van der Schueren, W., et al. (2021). Structural basis for broad  
634 coronavirus neutralization. *Nature Structural & Molecular Biology*.
- 635 Schmidt, F., Weisblum, Y., Muecksch, F., Hoffmann, H.-H., Michailidis, E., Lorenzi, J.C.C.,  
636 Mendoza, P., Rutkowska, M., Bednarski, E., Gaebler, C., et al. (2020). Measuring SARS-CoV-2  
637 neutralizing antibody activity using pseudotyped and chimeric viruses SARS-CoV-2 neutralizing  
638 antibody activity. *Journal of Experimental Medicine* 217.

- 639 Shang, J., Ye, G., Shi, K., Wan, Y., Luo, C., Aihara, H., Geng, Q., Auerbach, A., and Li, F.  
640 (2020). Structural basis of receptor recognition by SARS-CoV-2. *Nature* 581, 221-224.
- 641 Skowronski, D.M., Setayeshgar, S., Zou, M., Prystajek, N., Tyson, J.R., Galanis, E., Naus, M.,  
642 Patrick, D.M., Sbihi, H., El Adam, S., et al. (2021). Single-dose mRNA vaccine effectiveness  
643 against SARS-CoV-2, including Alpha and Gamma variants: a test-negative design in adults 70  
644 years and older in British Columbia, Canada. *Clinical Infectious Diseases*.
- 645 Song, G., He, W.-t., Callaghan, S., Anzanello, F., Huang, D., Ricketts, J., Torres, J.L., Beutler,  
646 N., Peng, L., Vargas, S., et al. (2020). Cross-reactive serum and memory B cell responses to  
647 spike protein in SARS-CoV-2 and endemic coronavirus infection. *bioRxiv*,  
648 2020.2009.2022.308965.
- 649 Starr, T.N., Greaney, A.J., Addetia, A., Hannon, W.W., Choudhary, M.C., Dingens, A.S., Li, J.Z.,  
650 and Bloom, J.D. (2021). Prospective mapping of viral mutations that escape antibodies used to  
651 treat COVID-19. *Science* 371, 850.
- 652 Starr, T.N., Greaney, A.J., Hilton, S.K., Ellis, D., Crawford, K.H.D., Dingens, A.S., Navarro, M.J.,  
653 Bowen, J.E., Tortorici, M.A., Walls, A.C., et al. (2020). Deep Mutational Scanning of SARS-CoV-  
654 2 Receptor Binding Domain Reveals Constraints on Folding and ACE2 Binding. *Cell* 182, 1295-  
655 1310.e1220.
- 656 Tazuin, A., Nayrac, M., Benlarbi, M., Gong, S.Y., Gasser, R., Beaudoin-Bussi eres, G., Brassard,  
657 N., Laumaea, A., V ezina, D., Pr evost, J., et al. (2021). A single dose of the SARS-CoV-2  
658 vaccine BNT162b2 elicits Fc-mediated antibody effector functions and T cell responses. *Cell*  
659 *Host & Microbe* 29, 1137-1150.e1136.
- 660 Tian, X., Li, C., Huang, A., Xia, S., Lu, S., Shi, Z., Lu, L., Jiang, S., Yang, Z., Wu, Y., et al.  
661 (2020). Potent binding of 2019 novel coronavirus spike protein by a SARS coronavirus-specific  
662 human monoclonal antibody. *Emerging Microbes & Infections* 9, 382-385.
- 663 Turo ov, B., Sikora, M., Sch urmann, C., Hagen, W.J.H., Welsch, S., Blanc, F.E.C., von B ulow,  
664 S., Gecht, M., Bagola, K., H orner, C., et al. (2020). In situ structural analysis of SARS-CoV-2  
665 spike reveals flexibility mediated by three hinges. *Science* 370, 203.
- 666 Ullah, I., Pr evost, J., Ladinsky, M.S., Stone, H., Lu, M., Anand, S.P., Beaudoin-Bussi eres, G.,  
667 Benlarbi, M., Ding, S., Gasser, R., et al. (2021). Live imaging of SARS-CoV-2 infection in mice  
668 reveals neutralizing antibodies require Fc function for optimal efficacy. *bioRxiv*,  
669 2021.2003.2022.436337.

- 670 Volz, E., Mishra, S., Chand, M., Barrett, J.C., Johnson, R., Geidelberg, L., Hinsley, W.R.,  
671 Laydon, D.J., Dabrera, G., O'Toole, Á., et al. (2021). Assessing transmissibility of SARS-CoV-2  
672 lineage B.1.1.7 in England. *Nature* 593, 266-269.
- 673 Voysey, M., Clemens, S.A.C., Madhi, S.A., Weckx, L.Y., Folegatti, P.M., Aley, P.K., Angus, B.,  
674 Baillie, V.L., Barnabas, S.L., Bhorat, Q.E., et al. (2021). Safety and efficacy of the ChAdOx1  
675 nCoV-19 vaccine (AZD1222) against SARS-CoV-2: an interim analysis of four randomised  
676 controlled trials in Brazil, South Africa, and the UK. *The Lancet* 397, 99-111.
- 677 Walls, A.C., Park, Y.-J., Tortorici, M.A., Wall, A., McGuire, A.T., and Veessler, D. (2020).  
678 Structure, Function, and Antigenicity of the SARS-CoV-2 Spike Glycoprotein. *Cell* 181, 281-  
679 292.e286.
- 680 Wang, C., Li, W., Drabek, D., Okba, N.M.A., van Haperen, R., Osterhaus, A.D.M.E., van  
681 Kuppeveld, F.J.M., Haagmans, B.L., Grosveld, F., and Bosch, B.-J. (2020). A human  
682 monoclonal antibody blocking SARS-CoV-2 infection. *Nature Communications* 11, 2251.
- 683 Wang, C., van Haperen, R., Gutiérrez-Álvarez, J., Li, W., Okba, N.M.A., Albulescu, I., Widjaja, I.,  
684 van Dieren, B., Fernandez-Delgado, R., Sola, I., et al. (2021). A conserved immunogenic and  
685 vulnerable site on the coronavirus spike protein delineated by cross-reactive monoclonal  
686 antibodies. *Nature Communications* 12, 1715.
- 687 Wang, N., Li, S.-Y., Yang, X.-L., Huang, H.-M., Zhang, Y.-J., Guo, H., Luo, C.-M., Miller, M., Zhu,  
688 G., Chmura, A.A., et al. (2018). Serological Evidence of Bat SARS-Related Coronavirus  
689 Infection in Humans, China. *Virologica Sinica* 33, 104-107.
- 690 Weisblum, Y., Schmidt, F., Zhang, F., DaSilva, J., Poston, D., Lorenzi, J.C.C., Muecksch, F.,  
691 Rutkowska, M., Hoffmann, H.-H., Michailidis, E., et al. (2020). Escape from neutralizing  
692 antibodies by SARS-CoV-2 spike protein variants. *eLife* 9, e61312.
- 693 Weiss, M. (2001). Global indicators of X-ray data quality. *Journal of Applied Crystallography* 34,  
694 130-135.
- 695 Winkler, H. (2007). 3D reconstruction and processing of volumetric data in cryo-electron  
696 tomography. *Journal of Structural Biology* 157, 126-137.
- 697 Wrapp, D., Wang, N., Corbett, K.S., Goldsmith, J.A., Hsieh, C.-L., Abiona, O., Graham, B.S.,  
698 and McLellan, J.S. (2020). Cryo-EM structure of the 2019-nCoV spike in the prefusion  
699 conformation. *Science* 367, 1260.



700 Xiao, T., Lu, J., Zhang, J., Johnson, R.I., McKay, L.G.A., Storm, N., Lavine, C.L., Peng, H., Cai,  
701 Y., Rits-Volloch, S., et al. (2021). A trimeric human angiotensin-converting enzyme 2 as an anti-  
702 SARS-CoV-2 agent. *Nature Structural & Molecular Biology* 28, 202-209.

703 Xu, C., Wang, Y., Liu, C., Zhang, C., Han, W., Hong, X., Wang, Y., Hong, Q., Wang, S., Zhao,  
704 Q., et al. (2021). Conformational dynamics of SARS-CoV-2 trimeric spike glycoprotein in  
705 complex with receptor ACE2 revealed by cryo-EM. *Science Advances* 7, eabe5575.

706 Yao, H., Song, Y., Chen, Y., Wu, N., Xu, J., Sun, C., Zhang, J., Weng, T., Zhang, Z., Wu, Z., et  
707 al. (2020). Molecular Architecture of the SARS-CoV-2 Virus. *Cell*.

708 Yu, J., Li, Z., He, X., Gebre Makda, S., Bondzie Esther, A., Wan, H., Jacob-Dolan, C., Martinez  
709 David, R., Nkolola Joseph, P., Baric Ralph, S., et al. Deletion of the SARS-CoV-2 Spike  
710 Cytoplasmic Tail Increases Infectivity in Pseudovirus Neutralization Assays. *Journal of Virology*  
711 95, e00044-00021.

712 Zheng, S.Q., Palovcak, E., Armache, J.-P., Verba, K.A., Cheng, Y., and Agard, D.A. (2017).  
713 MotionCor2: anisotropic correction of beam-induced motion for improved cryo-electron  
714 microscopy. *Nature Methods* 14, 331-332.

715 Zhou, P., Yang, X.-L., Wang, X.-G., Hu, B., Zhang, L., Zhang, W., Si, H.-R., Zhu, Y., Li, B.,  
716 Huang, C.-L., et al. (2020). A pneumonia outbreak associated with a new coronavirus of  
717 probable bat origin. *Nature* 579, 270-273.

718 Zhou, P., Yuan, M., Song, G., Beutler, N., Shaabani, N., Huang, D., He, W.-t., Zhu, X.,  
719 Callaghan, S., Yong, P., et al. (2021). A protective broadly cross-reactive human antibody  
720 defines a conserved site of vulnerability on beta-coronavirus spikes. *bioRxiv*,  
721 2021.2003.2030.437769.

722 Zhu, N., Zhang, D., Wang, W., Li, X., Yang, B., Song, J., Zhao, X., Huang, B., Shi, W., Lu, R., et  
723 al. (2020). A Novel Coronavirus from Patients with Pneumonia in China, 2019. *New England*  
724 *Journal of Medicine* 382, 727-733.

725

## 726 **Figure Legends**

### 727 **Figure 1. CV3-1 and CV3-25 Neutralize Emerging SARS-CoV-2 Variants.**

728 (A) Cell-surface staining of 293T cells expressing full-length Spike from indicated variants by  
729 CV3-1 (left panel) and CV3-25 (right panel) monoclonal Abs (mAbs). The graphs show the

730 median fluorescence intensities (MFIs). Dashed lines indicate the reference value obtained with  
731 Spike D614G. Error bars indicate means  $\pm$  SEM. These results were obtained in at least 3  
732 independent experiments. Statistical significance was tested using one-way ANOVA with a  
733 Holm-Sidak post-test (ns, non significant).

734 **(B)** The ability of CV3-1 and CV3-25 mAbs to neutralize Wuhan-Hu-1 (WT), D614G mutant,  
735 B.1.1.7, B.1.351, P.1, B.1.526 and B.1.617.2 pseudoviruses infectivity in 293T-hACE2 cells was  
736 measured as indicated in Star Methods. IC<sub>50</sub> values are shown. Error bars indicate means  $\pm$   
737 SEM. These results were obtained in at least 3 independent experiments.

738 **(C)** A scheme showing the experimental design for testing the in vivo efficacy of NAbs, CV3-1  
739 WT and CV3-25 G236A/S239D/A330L/I332E (GASDALIE) mutant (12.5 mg IgG/kg body weight)  
740 delivered intraperitoneally (i.p.) 1 day before challenging K18-hACE2 mice with a lethal dose (1  
741  $\times 10^5$  FFU) of B.1.351 SARS-CoV-2. Human IgG1-treated (12.5 mg IgG/kg body weight) mice  
742 were used as control.

743 **(D)** Temporal changes in mouse body weight in experiment shown in (C), with initial body  
744 weight set to 100%.

745 **(E)** Kaplan-Meier survival curves of mice (n = 6 per group) statistically compared by log-rank  
746 (Mantel-Cox) test for experiments as in (C).

747 Grouped data in (D) were analyzed by 2-way ANOVA followed by Tukey's multiple comparison  
748 tests. Statistical significance for group comparisons to isotype control are shown in black and for  
749 those to CV3-25 GASDALIE are shown in blue. \*, p < 0.05; \*\*, p < 0.01; \*\*\*, p < 0.001; \*\*\*\*, p  
750 < 0.0001; Mean values  $\pm$  SD are depicted.

751

## 752 **Figure 2. Conformational Dynamics of S<sub>B.1.1.7</sub> Bound with CV3-1 and CV3-25.**

753 **(A)** Conformational states of S<sub>B.1.1.7</sub> on lentiviral particles monitored by smFRET for unliganded,  
754 CV3-1 and CV3-25 bound S<sub>B.1.1.7</sub>. FRET histograms with number (N<sub>m</sub>) of individual dynamic  
755 molecules/traces compiled into a conformation-population FRET histogram (gray lines) and  
756 fitted into a 4-state Gaussian distribution (solid black) centered at 0.1-FRET (dashed cyan), 0.3-  
757 FRET (dashed red), 0.5-FRET (dashed green), and 0.8-FRET (dashed magenta).

758 **(B)** Proportion of different states of RBD identified by smFRET in (A). For parallel comparison  
759 to cryoET data, 0.8-FRET portion was omitted, due to its structural uncertainty.

760 **(C-D)** Zoomed-in views of SARS-CoV-2 pseudoviruses bearing S bound by CV3-1 (C) and CV3-  
761 25 (D) Fabs and representative slices of tomograms (insets). Scale bar, 50 nm. White arrows  
762 indicate bound Fabs. Red boxes, prefusion spikes; Blue boxes, post-fusion spikes.

763 (E) Proportion of different states of RBD at different conditions from cryoET data. UP state was  
764 separated by focused classification on the RBD region. The remaining of the RBDs were  
765 defined as DOWN state if there was no up RBD on the same spike, otherwise, they were  
766 considered as INTERMEDIATE state.

767 (F) Proportion of different RBD states of spikes on virions with and without Fabs bound. Spikes  
768 were grouped into 3-RBD-down, 1-RBD-up, 2-RBD-up and 3-RBD-up classes.

769 (G) Side views (top panel) and top views (middle and bottom panels) of subclasses of averaged  
770 S bound by CV3-1 Fabs.

771 (H) Side views (left column) of the consensus structure of unliganded (bottom) and CV3-25  
772 bound (top) S and top views of subclass averages (right columns) obtained after focused  
773 classification on the RBD of S.

774 In (G-H), dotted lines indicate the positions of top-view sections. Blue arrowheads point to the  
775 gap in density between RBD and the neighboring NTD that appears when the RBD moves into  
776 the UP-state. Scale bar, 5 nm.

777 (I) Segmentation of subclass averages of unliganded (bottom) and CV3-25 bound (top) S. Top  
778 views and side views (insets) are shown for 3-RBD-down, 1-RBD-up, 2-RBD-up and 3-RBD-up  
779 classes. Down RBDs and up RBDs are shown in blue and red respectively, CV3-25 Fabs are  
780 shown in orange.

781

### 782 **Figure 3. CV3-1 Binds to the 485-GFN-487 Loop of RBD.**

783 (A) Side view (top panel) and top views (bottom panel) of subtomogram average of CV3-1  
784 bound S. Dotted lines indicate the positions of top-view sections. Scale bar, 5 nm.

785 (B) Segmentation of CV3-1 bound S. Side view (left) and top view (right) are shown. CV3-1  
786 Fabs are shown in purple, RBDs are shown in red and the rest of S in cyan.

787 (C) Fitting cryoET density map of CV3-1 bound S with 3-RBD-down atomic model of S (PDB:  
788 7LWS). Top panel: rigid-body fitting. Bottom panel: flexible fitting.

789 (D, E) Zoomed-in view of cryoET map fitting with RBD-up atomic model (D, PDB: 7LWV) and  
790 ACE2-S atomic model (E, PDB: 7KJ4) at the interaction site.

791 (F-G) Binding of CV3-1 (F) and ACE2-Fc (G) to 293T cells expressing selected full-length Spike  
792 harboring RBM mutations. The graphs shown represent the median fluorescence intensities  
793 (MFIs) normalized to the MFI obtained with CV3-25 staining of the corresponding mutant.  
794 Dashed lines indicate the reference value obtained with Spike D614G (WT). Error bars indicate  
795 means  $\pm$  SEM. These results were obtained in at least 4 independent experiments. Statistical

796 significance was tested using one-way ANOVA with a Holm-Sidak post-test (\* $p < 0.05$ ; \*\* $p <$   
797  $0.01$ ; \*\*\* $p < 0.001$ ; \*\*\*\* $p < 0.0001$ ).

798

799 **Figure 4. CV3-1 Triggers S1 Shedding.**

800 (A) Statistical table of pre-fusion S selected manually for cryoET analysis.

801 (B) S1 shedding was evaluated by transfection of 293T cells followed by radiolabeling in  
802 presence of CV3-1, CV3-25 or ACE2-Fc and immunoprecipitation of cell lysates and  
803 supernatant with CV3-25 and a rabbit antiserum raised against SARS-CoV-2 RBD produced in-  
804 house. Furin KO = furin cleavage site knockout. These results are representative of two  
805 independent experiments.

806 (C) CV3-25, CV3-1 and ACE2-Fc recognition of 293T cells expressing the full-length SARS-  
807 CoV-2 ancestral S with or without (Furin KO) a functional furin cleavage site. Histograms  
808 depicting representative cell-surface staining of cells transfected with wild-type Spike (black line),  
809 Furin KO (red line) or with an empty vector (light gray). Error bars indicate means  $\pm$  SEM. These  
810 results were obtained in at least 6 independent experiments. Statistical significance was tested  
811 using a Mann-Whitney U test (\*\* $p < 0.01$ ; \*\*\* $p < 0.001$ ; ns, non significant).

812 (D) CV3-1 induced S1 shedding of S from selected emerging variants, measured as in (B).

813

814 **Figure 5. CV3-25 Binds to a Conserved Epitope in S2.**

815 (A) Side view (top panel) and top views (bottom panel) of subtomogram averaged CV3-25  
816 bound S. Dotted lines indicate the positions of top-view sections. Scale bar, 5 nm.

817 (B) Segmentation of CV3-25 bound S. Side view (left) and top view (right) are shown. CV3-25  
818 Fabs are shown in orange and S is shown in cyan.

819 (C) SARS-CoV-2 Spike sequence depicting the different subunits and domains composing the  
820 full-length Spike protein. With permission from AAAS. (Wrapp et al., 2020)

821 (D) Pools of peptide covering the whole S2 subunit sequence were used to identify the linear  
822 region recognized by CV3-25 mAb. Indirect ELISA was performed using SARS-CoV-2 S2  
823 peptide pools and incubation with the CV3-25 mAb. Peptide pools covering the connector  
824 domain (CD) region with significant positive signal were highlighted in red (peptide pools #49  
825 and #50). Depiction of the SARS-CoV-2 Spike individual peptides from the peptide pools #49  
826 and #50, with a 4 amino acid residue overhang. Individual peptides covering the S2 connector  
827 domain region were used to identify the region recognized by CV3-25 mAb.

828 (E) Indirect ELISA was performed using SARS-CoV-2 S2 individual peptides (from peptide  
829 pools #49 and #50) and incubation with the CV3-25 mAb. CV3-25 binding was detected using

830 HRP-conjugated anti-human IgG and was quantified by relative light units (RLU). Single  
831 peptides with significant positive signal were highlighted in red (peptides #288 and #289). Amino  
832 acid sequence of peptides recognized by CV3-25 (peptides #288 and #289, shown in red) and  
833 of neighboring peptides not recognized by CV3-25 (peptides #287 and #290, shown in black).

834 (F) Rigid fitting cryoET density map of CV3-25 bound S with atomic model of closed prefusion S  
835 (PDB:6XR8). Peptides #288 and #289 location at the CV3-25 binding site are indicated in red.

836

837 **Figure 6. Molecular Details of Interaction of CV3-25 with SARS-CoV-2 Stem Peptide**  
838 **Spanning Residues 1140-1165 of S2.**

839 (A) Crystal structure of CV3-25 Fab in complex with the S2<sub>1140-1165</sub> stem peptide. The overall  
840 structure of the complex is shown as a ribbon diagram (top panel) and with the molecular  
841 surface displayed over the Fab (bottom panel). S2 peptide (orange) assumes a bent  
842 conformation with the N-terminal  $\alpha$ -helical portion binding primarily to CDRs H1 and H2 (light  
843 green and cyan, respectively) and the random coil region interacting with CDR H3 (light pink). A  
844 non-canonical disulfide between C<sup>99</sup> and C<sup>100D</sup> of CDR H3 stabilizes the protruding hairpin in the  
845 CDR and likely strengthens its interactions with the C-terminal loop region of the S2 peptide.

846 (B) Close-up views into the CV3-25 Fab-S2<sub>1140-1165</sub> peptide interface. In the top panel the  
847 electrostatic potential (colored red, blue and white for negative, positive and neutral electrostatic  
848 potential respectively) is displayed over the molecular surface of the CV3-25 Fab (left) or S2-  
849 peptide (right) with 180° views of the complex. The bottom panel shows the network of H-bonds  
850 and salt bridges formed at the interface with orientations of complex as in the top panel. The  
851 putative glycosylation site at N<sup>1158</sup> on the S2 peptide is marked with an asterisk. Salt bridges  
852 and hydrogen bonds with bond lengths < 3.5 Å as calculated by PISA<sup>15</sup>  
853 (<https://www.ebi.ac.uk/pdbe/pisa/>) are denoted as yellow and blue dashed lines, respectively. A  
854 total of 11 H-bonds and 4 salt bridges are formed at the interface, with D<sup>1153</sup> and K<sup>1157</sup> of the S2  
855 peptide contributing the majority of the hydrophilic contacts. The S2 bend and loop conformation  
856 (1158-1165) are stabilized by contacts to CDRs H1/H2/H3 with 4 H-bonds and 1 salt-bridge  
857 formed at the interface. In addition,  $\pi$ -proline- $\pi$  sandwich stacking interactions formed between  
858 the conserved residues F<sup>1156</sup> and P<sup>1162</sup> of S2 and Y<sup>32</sup> of CDR H1 further stabilize the interface.  
859 CV3-25 light chain contacts are limited to only a single water mediated H-bond to the C-terminal  
860 D<sup>1165</sup> of S2.

861 (C) The network of interaction between residues at the CV3-25 Fab and the S2-peptide  
862 interface. Fab residues in the framework and CDRs of the Fab are colored as in (A) with  
863 interactions defined by a 5-Å distance criterion cutoff shown as lines. Salt bridges and H-bonds

864 (bond length less than 3.5 Å) are shown as red dashed and blue solid lines, respectively.  
865 Hydrophobic interactions or bond distances between 3.5–5.0 Å are shown as grey dotted lines.  
866 (D) Diagram showing the buried surface area (BSA) of each individual S2 peptide residue in the  
867 CV3-25 Fab-S2 peptide complex. The BSA values of individual S2 residues were calculated  
868 using PISA<sup>15</sup> (<https://www.ebi.ac.uk/pdbe/pisa/>) and are shown as the average of the values  
869 obtained for two complexes in the asymmetric unit of the crystal.  
870 (E) Sequence alignment of the S glycoprotein stem-peptide regions from representative beta-  
871 coronaviruses and two human alpha-coronaviruses. The helical regions as determined from  
872 PDB entry 6XR8 (residues 1140-1145) and the CV3-25-peptide structure (residues 1146-1156)  
873 are indicated above the sequence. S2 residues involved in the Fab-peptide interface are  
874 marked above the sequence with (\*) and hydrogen-bonded or salt-bridged residues are marked  
875 with (+) for side chain, (-) for main chain and (±) for both side chain and main chain. The  
876 identical residues as compared to SARS-CoV-2 are highlighted in red with conservative  
877 changes marked in orange and non-conservative changes in black.  
878 (F) SPR sensorgrams of three SARS-CoV-2 S2 peptides binding to the immobilized CV3-25 IgG  
879 on a Protein A chip. The experimental data (colored) are fitted to a 1:1 Langmuir model (black)  
880 and the resulting kinetic constants are as shown. The minimal peptide recognized by CV3-25  
881 with a low  $K_D$  value (~1 μM) is 1153-DKYFKNHTSPD-1163. A 2 or 4 aa C-terminal extension  
882 leads to a 18 to 32 fold increase in the binding affinity (with a the 2-10 fold increase to the  
883 binding on-rate).  
884 (G) S2-peptide based structural comparison of CV3-25 Fab-SARS-CoV-2 S2<sub>1140-1165</sub> peptide and  
885 P6- MERS-CoV S2<sub>1230-1240</sub> peptide (PDB code: 7M55) in two orthogonal views. Only the variable  
886 regions of both Fabs are shown as surfaces for clarity.

887

### 888 **Figure 7. CV3-25 Inhibits S-Mediated Virus Fusion.**

889 (A) The crystal structures of the CV3-25 Fabs (purple and yellow) with the S2<sub>1140-1165</sub> peptides  
890 (blue) were superimposed onto the stem helix of the prefusion S atomic model (gray, PDB 6XR8)  
891 and fitted into the CV3-25 CryoET structure. Left panel: side view indicates that CV3-25 does  
892 not dock into the cryoET density map. There are clashes between two Fabs (middle panel,  
893 bottom view) and the tails of binding stem helix (right panel, top view).  
894 (B) Flexible fitting with a combined model containing the CV3-25\_S2<sub>1140-1165</sub> crystal structure  
895 and prefusion S structure (gray, 6XR8) onto the cryoET structure. CV3-25 Fabs (purple and  
896 yellow) dock into the cryoET density map (left panel). The torsions of binding stem helix (blue,

897 helix axes in cyan and pink, respectively) after fitting, comparing to original position of stem helix  
898 in 6XR8 (gray, helix axes in dark gray), were shown in middle and right panels. The third  
899 protomer was omitted for clarity.

900 (C) Superimposition of peptide bound CV3-25 (purple, heavy chain; green, light chain) to the -  
901 fusion S (gray, PDB 6XRA). The peptide (pink) was aligned to the stem helix in the spike. The  
902 glycan on residue ASN1158 are shown in sphere representation (yellow). Possible clashes are  
903 indicated in red circles.

904 (D, E) Investigation of Virus-Cell fusion activity in presence and absence of CV-35 mAb by the  
905 split nanoluc complementation assay. A scheme of the split nanoluc complementation assay  
906 experimental design was shown in (C).

907

### 908 **Supplementary Figure Legends**

#### 909 **Figure S1. CV3-1 and CV3-25 Neutralize SARS-CoV-2 Variants In Vitro and Protect In Vivo.** 910 **Related to Figure 1.**

911 (A, B) Cell-surface staining of 293T cells expressing full-length Spike from indicated variants  
912 (B.1.1.7, B.1.351, P.1, B.1.429, B.1.526, B.1.525) or their corresponding individual mutations by  
913 CV3-1 (A) and CV3-25 (B) mAbs. The graphs show median fluorescence intensities (MFIs).  
914 Dashed lines indicate the reference value obtained with Spike D614G. Error bars indicate  
915 means  $\pm$  SEM. These results were obtained in at least two independent experiments. Statistical  
916 significance was tested using Kruskal-Wallis test with a Dunn's post-test (\* $p < 0.05$ ; ns, non  
917 significant).

918 (C) Viral loads (FFUs/mg) from indicated tissue using Vero E6 cells as targets in mice  
919 prophylactically treated with CV3-1 and CV3-25 GASDALIE for the experiment shown in Figure  
920 1C. Undetectable virus amounts were set to 1.

921 (D) A plot showing mRNA levels SARS-CoV-2 nucleocapsid (N gene) from nose, lung and brain  
922 tissues of K18-hACE2 mice after sacrifice at times indicated in Figure1E.

923 (E-F) A plot showing mRNA levels of indicated cytokines from lung and brain tissues of K18-  
924 hACE2 mice after sacrifice at times indicated in Figure1E. The mRNA amounts in (D-F) were  
925 normalized to Gapdh mRNA and to levels seen in uninfected mice. Viral loads and inflammatory  
926 cytokine profile in indicated tissues were determined after necropsy for mice that succumb to  
927 infection at day 6 and for surviving mice at 10 dpi. Grouped data in (C-F) were analyzed by 2-  
928 way ANOVA followed by Tukey's multiple comparison tests.

929

930 **Figure S2. Conformational Dynamics of CV3-1 and CV3-25 Bound S<sub>B.1.1.7</sub>. Related to**  
931 **Figure 2.**

932 (A-C) Tilt angles of spikes on unliganded, CV3-1 Fab treated, and CV3-25 Fab treated  
933 pseudoviruses. Scheme graph of tilt angle is shown in (E).

934 (D) The binding of CV3-1 or CV3-25 to SARS-CoV-2 S D614G expressed on 293T cells was  
935 measured flow cytometry. Cells were incubated with increasing amounts of mAbs and their  
936 binding was detected using a goat anti-human IgG AlexaFluor647. The Hill coefficients were  
937 determined using GraphPad software. These results were obtained in 3 independent  
938 experiments.

939 (E) Subclass averages obtained after focused classification on the RBD of CV3-25 bound S.  
940 Bottom views (left) and segmentations (right) are shown for 3-RBD-down, 1-RBD-up, 2-RBD-up  
941 and 3-RBD-up classes. CV3-25 Fabs are shown in orange.

942

943 **Figure S3. Resolution Assessment of Subtomogram Averaging Structure for CV3-1**  
944 **Bound Spike. Related to Figures 3 and 5.**

945 (A, D, G) Resolution estimation based on Fourier shell correlation curves and 0.143 as a cutoff  
946 value.

947 (B, E, H) Local resolution is estimated with Resmap.

948 (C, F, I) Subtomogram averaged structures are colored according to the local resolution.

949

950 **Figure S4. Cryo-EM Data for the Complex of CV3-25 Fab with SARS-CoV-2 HexaPro Spike.**  
951 **Related to Figure 5.**

952 (A) Cryo-EM sample preparation. Size-exclusion chromatogram of the purified, non-tagged  
953 SARS-CoV-2 HexaPro spike with CV3-25 Fab (molar-ratio: 1:20). SDS-PAGE analysis of peak1  
954 of the spike Fab mixture shows that intact CV3-25 Fab is physically associated with the spike.

955 (B, C) Representative electron micrograph after motion correction (B, scale bar 50 nm) and  
956 selected 2D averaged classes (C, in total 460k particles).

957 (D) The Fourier shell correlation curves indicate an overall resolution of 3.49 Å using non-  
958 uniform refinement with C1 symmetry (left panel). The view direction distribution plot of all  
959 particles used in the final refinement shown as a heatmap (right panel).

960 (E) The final overall map is shown and colored according to the local resolution as calculated in  
961 cryoSPARC using a FSC cutoff of 0.143.

962 (F) Side and top views of the cryo-EM density map (semi-transparent grey surface) fitted with a  
963 prefusion spike model with a one-RBD-up conformation shown in cyan. An initial model



964 template was generated using the NTD (residues 12-305) from PDB entry 7LY31, the RBD  
965 (residues 306-541) and S1-S2 core (residues 542-1139) from 6XKL, and the S2 stem helix  
966 (1140-1162) from 6XR8 with the “fit-in-map” function in chimeraX.

967 **(G)** A S2-stem-peptide based superimposition of the variable region from the CV3-25-peptide  
968 crystal structure (yellow and blue) with the cryo-EM model mimics the one-Fab-bound state. The  
969 discrete, feeble and nearly-isotropic density around the S2-helix indicates that there is a high  
970 degree of local dynamic motion and a diverse collection of Fab-stem-peptide  
971 conformations/orientations relative to the rigid S2 core that may transiently coexist.

972

973 **Figure S5. CV3-25 Binds on a Conserved Epitope on S2. Related to Figure 5.**

974 **(A-B)** Gallery of spikes bound to one CV3-25 Fab (A) and two CV3-25 Fabs (B) on lentiviral  
975 particles. CV3-25 Fabs are indicated by yellow arrowheads.

976 **(C-H)** Side view (C, F) and top view (D, G) of averaged structure of S bound with one CV3-25  
977 Fab (C-E) and two CV3-25 Fabs (F-H). Segmentations of the structures are shown in (E, H).  
978 CV3-25 Fabs are shown in orange and S is shown in cyan.

979 **(I)** Proportion of S bound with one and two CV3-25 Fabs.

980

981 **Figure S6. CV3-25 Binds on a Conserved Epitope on S2. Related to Figures 5 and 6**

982 **(A)** 293T-S cells were induced with doxycycline (Dox) to express wild-type SARS-CoV-2 S  
983 glycoprotein, or mock treated as a control. Two days after induction, cells were lysed, and cell  
984 lysates were subjected to Western blotting with CV3-1 or CV3-25, or with a mouse (Ms) anti-S1  
985 antibody or rabbit (Rb) anti-S2 antibody as controls.

986 **(B)** 293T-S cells induced to express the SARS-CoV-2 S glycoprotein (gp) were lysed with lysis  
987 buffer. Cell lysates were then treated with PNGase F or, as a control, mock treated (No Rx). The  
988 cell lysates were then Western blotted with the CV3-25 antibody. S', S2' and S2'' are  
989 deglycosylated forms of S or S2.

990 **(C)** Cell-surface staining of 293T cells expressing the wild-type SARS-CoV-2 Spike with CV3-25  
991 mAb in presence of increasing concentrations of S2 peptides #288 (15-mer), #289 (15-mer),  
992 #289 (11-mer) or a scrambled peptide (15-mer) as a control. The graphs show the median  
993 fluorescence intensities (MFIs) normalized to the condition without any peptide (0  $\mu$ M). Error  
994 bars indicate means  $\pm$  SEM. These results were obtained in 3 independent experiments.

995 **(D)** SPR binding of SARS-CoV-2 S2 peptides to immobilized CV3-25. CV3-25 IgG was  
996 immobilized on a protein A chip either to 2500 or 7500 RU prior to peptide injection. The S2  
997 peptides of different truncations or the equivalent scrambled peptides were injected at the

998 indicated concentrations. The peak response was taken to be the background corrected  
999 response at the steady state where the binding reached equilibrium. The data shown is from  
1000 three independent experiments.

1001 (E) Pseudoviruses encoding for the luciferase reporter gene and bearing SARS-CoV-2 Spike  
1002 D614G were used to infect 293T-hACE2 target cells. Pseudovirions were incubated with CV3-  
1003 25 mAb (10  $\mu$ g/mL) in presence of increasing concentrations of S2 peptide #289, or peptide  
1004 scramble as a control, for 1h at 37°C prior infection of 293T-hACE2 cells for 48h at 37°C. Error  
1005 bars indicate means  $\pm$  SEM. These results were obtained from at least 3 independent  
1006 experiments. Statistical significance was tested using (C) one-way ANOVA with a Holm-Sidak  
1007 post-test or (E) an unpaired T test (\*\*p < 0.01; \*\*\*p < 0.001; \*\*\*\*p < 0.0001; ns, non significant).

1008

1009 **Figure S7. Crystal Structure of CV3-25-S2 Peptide Complex. Related to Figure 6.**

1010 (A) Ribbon diagram of the superposition of the two copies of CV3-25 Fab- S<sub>2</sub><sup>1140-1165</sup> peptide  
1011 complex from the asymmetric unit of the crystal. The overall structures of these two copies are  
1012 very similar with a root mean square deviation (RMSD) of equivalent C $\alpha$  atoms of 0.496 Å for  
1013 the complex, 0.499 Å for the Fab and 0.305 Å for the S2 peptide.

1014 (B) 2Fo-Fc electron density map of S2 peptide contoured at 1.5  $\sigma$ . The N-terminal non-contact  
1015 S2 residues D<sup>1146</sup> to K<sup>1148</sup> are omitted for clarity. The surface of CV3-25 Fab is represented with  
1016 CDR H1, CDR H2, and CDR H3 colored in green, cyan and pink respectively.

1017 (C) V<sub>H</sub> and V<sub>L</sub> sequence alignments of affinity matured CV3-25 and its germline IGHV5-51 along  
1018 with two other S2-binding Abs, CC40.8 (anti SARS-CoV-2)<sup>6, 17</sup> and B6 (anti MERS-CoV)<sup>5</sup>. CDR  
1019 sequences are colored as indicated in Figure 6. The buried surface residues (BSA > 0 Å) as  
1020 calculated by PISA<sup>15</sup> are shaded in grey. Contact residues involved in salt-bridges or H-bonds to  
1021 S2 peptide are marked above the sequence with (+) for the side chain and (-) for the main chain.  
1022 Somatic mutated residues as compared to the germline sequence are highlighted with blue  
1023 boxes. The peptide binding paratope of CV3-25 is predominantly formed by CDRs of the heavy  
1024 chain which contributes ~95% of the overall S2 buried surface area (BSA) from the Fab (BSA of  
1025 637.6 Å<sup>2</sup> and 27.6 Å<sup>2</sup> for the heavy and light chain, respectively). The paratope-epitope interface  
1026 is comprised mostly of hydrophilic interactions which includes an extensive network of charge  
1027 complementarity (**Fig. 6B and C**). In the  $\alpha$ -helical segment of the peptide there are 5 hydrogen-  
1028 bonds (H-bonds) and 3 salt-bridges formed between the conserved S2 residue D<sup>1153</sup> and K<sup>1157</sup>  
1029 (either side chain or backbone) with the CDR H1/H2 side chain atoms of residues T<sup>30</sup>, R<sup>31</sup>/D<sup>54</sup>,  
1030 D<sup>56</sup> or the main chain atoms of CDR H1/H2/H3 (residues W<sup>33</sup>/Y<sup>52</sup>/Q<sup>97</sup>) with the bonding  
1031 distances < 3.2 Å. As a result, the highly conserved D<sup>1153</sup> and K<sup>1157</sup> have the highest BSA

1032 among the 20 structurally resolved S2 residues, underlying the structural basis of CV3-25's  
1033 broad neutralizing capacity against beta-coronaviruses.

1034

1035 Video S1. Flexible Fitting of CV3-1 Bound SARS-CoV-2 Spike cyroET Structure with 3-RBD-  
1036 down atomic model (PDB 7lws). Both side view and top view were recorded.

1037 Video S2. Flexible Fitting of 2 CV3-25 Bound SARS-CoV-2 Spike cyroET Structure with  
1038 prefusion S (6xr8) superimposed with two CV3-25 models at the stem helix.

1039

1040 **Table S1. CryoET Data Acquisition and Image Processing**

| Sample                         | CV3-1           | CV3-25          | unliganded      |
|--------------------------------|-----------------|-----------------|-----------------|
| <b>Data Collection</b>         |                 |                 |                 |
| Microscope                     | FEI Titan Krios | FEI Titan Krios | FEI Titan Krios |
| Voltage (kV)                   | 300             | 300             | 300             |
| Energy-filter (ev)             | 20              | 20              | 20              |
| Detector                       | Gatan K3        | Gatan K3        | Gatan K3        |
| Recording Mode                 | Counting        | Counting        | Counting        |
| Pixel size (Å)                 | 1.346           | 1.346           | 1.346           |
| Defocus range (µm)             | -2 to -5        | -2 to -5        | -2 to -5        |
| Acquisition scheme             | -60°/60°, 3°    | -60°/60°, 3°    | -60°/60°, 3°    |
| Total Dose (e/Å <sup>2</sup> ) | ~120            | ~120            | ~120            |
| Frame number                   | 10              | 10              | 10              |
| Tomograms                      | 56              | 49              | 63              |
| <b>Image processing</b>        |                 |                 |                 |
| Virus particles                | 298             | 299             | 345             |
| Subtomograms                   | 1353            | 7739            | 9967            |
| Symmetry                       | C3              | C1              | C1              |

Resolution at 0.143 FSC (Å)                      12                                      11                                      10

EMDB ID

1041

1042 **Table S2. Crystallographic Data Collection and Refinement Statistics.**

| <b>CV3-25 Fab_ S2<sub>1140-1165</sub> peptide complex</b>     |                           |
|---------------------------------------------------------------|---------------------------|
| <b>Data collection</b>                                        |                           |
| Wavelength, Å                                                 | 0.979                     |
| Resolution range, Å                                           | 38.6 - 2.15 (2.23 - 2.15) |
| Space group                                                   | P2 <sub>1</sub>           |
| Unit cell parameter                                           |                           |
| a, b, c, Å                                                    | 82.8, 85.2, 87.1          |
| α, β, γ, °                                                    | 90, 114.77, 90            |
| Redundancy                                                    | 25.7 (2.0)                |
| Completeness, %                                               | 96.5 (81.9)               |
| Mean I/sigma(I)                                               | 6.18 (2.3)                |
| R <sub>merge</sub> <sup>a</sup>                               | 0.185 (0.489)             |
| R <sub>pim</sub> <sup>b</sup>                                 | 0.119 (0.329)             |
| CC <sub>1/2</sub> <sup>c</sup>                                | 0.942 (0.714)             |
| Wilson B <sub>factor</sub> , (1/Å <sup>2</sup> ) <sup>d</sup> | 38.7                      |
| <b>Refinement</b>                                             |                           |
| R <sub>work</sub> <sup>e</sup>                                | 0.196 (0.256)             |
| R <sub>free</sub> <sup>f</sup>                                | 0.239 (0.290)             |
| Resolution, Å                                                 | 38.6 - 2.15               |
| # of non-hydrogen atoms                                       |                           |
| proteins                                                      | 7,032                     |
| water                                                         | 530                       |
| Overall B <sub>factor</sub> , (Å <sup>2</sup> )               |                           |
| proteins                                                      | 45                        |
| ligands                                                       | 58                        |
| water                                                         | 47                        |
| RMS (bond lengths), Å                                         | 0.009                     |
| RMS (bond angles), °                                          | 1.17                      |
| Ramachandran <sup>g</sup>                                     |                           |
| Favored, %                                                    | 97.8                      |

|             |      |
|-------------|------|
| Allowed, %  | 2.2  |
| Outliers, % | 0.0  |
| PDB ID      | 7NAB |

1043 Statistics for the highest-resolution shell are shown in parentheses.

1044 <sup>a</sup> $R_{\text{merge}} = \sum |I - \langle I \rangle| / \sum I$ , where  $I$  is the observed intensity and  $\langle I \rangle$  is the average intensity obtained from  
 1045 multiple observations of symmetry-related reflections after rejections

1046 <sup>b</sup> $R_{\text{pim}} =$  as defined in (Weiss, 2001)

1047 <sup>c</sup> $CC_{1/2} =$  as defined by Karplus and Diederichs (Karplus and Diederichs, 2012)

1048 <sup>d</sup>Wilson  $B_{\text{factor}}$  as calculated in (Popov and Bourenkov, 2003)

1049 <sup>e</sup> $R = \sum \|F_o - F_c\| / \sum |F_o|$ , where  $F_o$  and  $F_c$  are the observed and calculated structure factors,  
 1050 respectively

1051 <sup>f</sup> $R_{\text{free}} =$  as defined by Brünger (Brunger, 1997)

1052 <sup>g</sup>Calculated with MolProbity

1053

1054 **Table S3. Cryo-EM Data Collection and Refinement Statistics**

1055

| <i>Protein</i>                                     | <b>CV3-25 Fab_ SARS-CoV-2 HexaPro<br/>spike complex</b> |
|----------------------------------------------------|---------------------------------------------------------|
| <i>EMDB</i>                                        | <i>TBD</i>                                              |
| <b><u>Data collection and Reconstruction</u></b>   |                                                         |
| <b>Microscope</b>                                  | <i>Titan Krios</i>                                      |
| <i>Voltage (kV)</i>                                | 300                                                     |
| <i>Electron dose (e<sup>-</sup>/Å<sup>2</sup>)</i> | 59.3                                                    |
| <b>Detector</b>                                    | <i>K2-summit with Bioquantum Image Filter</i>           |
| <i>Magnification</i>                               | 165,000                                                 |
| <i>Pixel size (Å/pixel)</i>                        | 0.821                                                   |
| <i>Defocus range (μm)</i>                          | 0.537 – 2.351                                           |
| <b>Micrographs collected</b>                       | 6460                                                    |

---

|                                                        |                         |
|--------------------------------------------------------|-------------------------|
| <i>Particles extracted/final</i>                       | <i>1630360 / 184874</i> |
| <i>Symmetry imposed</i>                                | <i>C1</i>               |
| <i>Box size (pixel)</i>                                | <i>432</i>              |
| <i>Unmasked and masked resolution at 0.143 FSC (Å)</i> | <i>4.09 / 3.49</i>      |

1056

1057

1058

## 1059 **METHOD DETAILS**

### 1060 **Cell Lines**

1061 293T human embryonic kidney cells (ATCC) and 293T-ACE2 cells were maintained at 37°C  
1062 under 5% CO<sub>2</sub> in Dulbecco's Modified Eagle Medium (DMEM) (Wisent), supplemented with 5%  
1063 fetal bovine serum (FBS) (VWR) and 100 U/mL penicillin/streptomycin (Wisent). 293T-ACE2  
1064 cells stably expressing human ACE2 are derived from 293T cells and were maintained in  
1065 medium supplemented with 2 µg/mL of puromycin (Millipore Sigma) (Prévost et al., 2020)

### 1066 **Plasmids and Site-Directed Mutagenesis**

1067 The plasmids expressing the wildtype SARS-CoV-2 Spike was previously reported (Hoffmann et  
1068 al., 2020). The plasmid encoding for SARS-CoV-2 S RBD (residues 319-541) fused with a  
1069 hexahistidine tag was previously described (Beaudoin-Bussièrès et al., 2020). The individual  
1070 mutations in the full-length SARS-CoV-2 Spike expressor, the furin cleavage site mutations  
1071 (R682S/R683S) and the Spike from the B.1.429 lineage (S13I, W152C, L452R, D614G) were  
1072 generated using the QuikChange II XL site-directed mutagenesis kit (Agilent Technologies). The  
1073 amino acid deletions in the full-length SARS-CoV-2 Spike expressor were generated using the  
1074 Q5 site-directed mutagenesis kit (NEB). The presence of the desired mutations was determined  
1075 by automated DNA sequencing. The plasmids encoding the Spike from the B.1.1.7 lineage  
1076 (Δ69-70, Δ144, N501Y, A570D, D614G, P681H, T716I, S982A and D1118H), the B.1.351  
1077 lineage (L18F, D80A, D215G, Δ242-244, R246I, K417N, E484K, N501Y, D614G, A701V), the  
1078 P.1 lineage (L18F, T20N, P26S, D138Y, R190S, K417T, E484K, N501Y, D614G, H655Y,  
1079 T1027I) and the B.1.526 lineage (L5F, T95I, D253G, E484K, D614G, A701V) were codon-  
1080 optimized and synthesized by Genscript. The plasmids encoding the Spike from the B.1.617.1  
1081 (E154K, L452R, E484Q, D614G, P681R) and the B.1.617.2 (T19R, Δ156-158, L452R, T478K,  
1082 D614G, P681R, D950N) lineages were generated by overlapping PCR using a codon-optimized  
1083 wild-type SARS-CoV-2 Spike gene that was synthesized (Biobasic, Markham, ON, Canada) and  
1084 cloned in pCAGGS as a template. All constructs were validated by Sanger sequencing. The  
1085 plasmid encoding for the ACE2-Fc chimeric protein, a protein composed of an ACE2  
1086 ectodomain (1–615) linked to an Fc segment of human IgG1 was previously reported (Anand et  
1087 al., 2020).

### 1088 **Antibodies**

1089 The human antibodies (CV3-1 and CV3-25) used in the work were isolated from the blood of  
1090 convalescent donor S006 (male) recovered 41 days after symptoms onset using fluorescent  
1091 recombinant stabilized Spike ectodomains (S2P) as probes to identify antigen-specific B cells as  
1092 previously described (Jennewein et al., 2021). Site-directed mutagenesis was performed on  
1093 plasmids expressing CV3-25 antibody heavy chain in order to introduce the GASDALIE  
1094 mutations (G236A/S239D/A330L/I332E) using the QuickChange II XL site-directed mutagenesis  
1095 protocol (Stratagene) (Ullah et al., 2021). Two New Zealand White rabbits were immunized with  
1096 purified recombinant SARS-CoV-2 RBD proteins using MediMabs' 77-day Canadian Council on  
1097 Animal Care (CCAC)-accredited protocol. Animals were hosted and handled at the CRCHUM  
1098 Animal Facility and the experimental protocol received approval from the Institutional Animal  
1099 Protection Committee prior the beginning of the manipulation (protocol #IP18039AFI). The first  
1100 immunization was done using complete Freund's adjuvant (Millipore Sigma) followed by 4  
1101 immunizations with incomplete Freund's adjuvant (Millipore Sigma). Rabbits were used solely  
1102 for this project and were sacrificed by total exsanguination. Blood was processed and serum  
1103 was further used in immunoprecipitation experiments at 1:1000 dilution.

### 1104 **Cryo-electron Tomography Sample Preparation**

1105 *Lentiviral particles were collected and clarified by low-speed spinning (1500g for 5 min) twice,*  
1106 *then pelleted by ultracentrifugation (130,000g for 2 hour) once and resuspended in PBS buffer.*  
1107 *6 nm gold tracer was added to the concentrated S-decorated HIV-1 lentivirus at 1:3 ratio, and 5*  
1108 *µl of the mixture was placed onto freshly glow discharged holey carbon grids (R 2/1, Quantifoil)*  
1109 *for 1 min. Grids were blotted with filter paper, and plunge frozen into liquid ethane by a*  
1110 *homemade gravity-driven plunger apparatus. Frozen grids were stored in liquid nitrogen until*  
1111 *imaging.*

### 1112 **Cryo-electron Tomography Data Collection**

1113 *Cryo-grids were imaged on a cryo-transmission electron microscope (Titan Krios, Thermo*  
1114 *Fisher Scientific) operated at 300 kV, using a Gatan K3 direct electron detector in counting*  
1115 *mode with a 20 eV energy slit. Tomographic tilt series between -60° and +60° were collected by*  
1116 *using SerialEM (Mastronarde, 2005)(Mastronarde, 2005) in a dose-symmetric scheme (Hagen*  
1117 *et al., 2017; Mastronarde and Held, 2017)(Hagen et al., 2017) with increments of 3°. The*  
1118 *nominal magnification was 64,000 X, giving a pixel size of 1.346 Å on the specimen. The raw*  
1119 *images were collected from single-axis tilt series with accumulative dose of ~120e per Å<sup>2</sup>. The*  
1120 *defocus range was -2 to -6 µm and 9 frames were saved for each tilt angle. Detailed data*  
1121 *acquisition parameters are summarized in Table S1.*

1122 *Frames were motion-corrected using Motioncorr2 (Zheng et al., 2017)(Zheng et al.,2017) to*  
1123 *generate drift-corrected stack files, which were aligned using gold fiducial makers by*  
1124 *IMOD/etomo (Mastronarde and Held, 2017)(Mastronarde and Held, 2017). The contrast transfer*  
1125 *function (CTF) was measured by the ctfplotter package within IMOD. Tilt stacks were CTF-*  
1126 *corrected by ctfphaseflip within IMOD. Tomograms were reconstructed by weighted back*  
1127 *projection and tomographic slices were visualized with IMOD.*

### 1128 **Cryo-electron Tomography Data Analysis**

1129 *For the CV3-1 sample, all spikes were manually picked. Euler angles were determined based*  
1130 *on the vector between two points, one on the head of the spike and the other on the membrane*  
1131 *where the spike locates. For CV3-25 and unliganded samples, a low-pass filtered (30Å)*  
1132 *structure from previous aligned S structure was used as the template for template matching*  
1133 *search in 8 x binned tomograms. Subtomograms were extracted for initial alignment. After this*  
1134 *alignment, particles with cross-correlation coefficients (CCC) below 0.25 were removed. Visual*  
1135 *inspection of the tomograms in IMOD confirmed that the rest of the subtomograms*  
1136 *corresponded to S trimers on the viral surface. Particles that had tilted by more than 90° relative*  
1137 *to their perpendicular positions to the viral surface were excluded. Subsequent processing was*  
1138 *performed by using I3 (Winkler, 2007) with 2 x and 4 x binned tomograms.*

1139 *All the density maps were segmented in the UCSF Chimera (Pettersen et al., 2004), and*  
1140 *ChimeraX (Goddard et al., 2018; Pettersen et al., 2021) was used for surface rendering and*  
1141 *visualization of cryo-ET maps and models. “Fit in map” tool in Chimera and ChimeraX was used*  
1142 *for rigid fitting. iMODFIT was used for flexible fitting (López-Blanco and Chacón, 2013).*

### 1143 **Mouse Experiments**

1144 *All experiments were approved by the Institutional Animal Care and Use Committees (IACUC)*  
1145 *of and Institutional Biosafety Committee of Yale University (IBSCYU). All the animals were*  
1146 *housed under specific pathogen-free conditions in the facilities provided and supported by Yale*  
1147 *Animal Resources Center (YARC). hACE2 transgenic B6 mice (heterozygous) were obtained*



1148 from Jackson Laboratory. 6–8-week-old male and female mice were used for all the  
1149 experiments. The heterozygous mice were crossed and genotyped to select heterozygous mice  
1150 for experiments by using the primer sets recommended by Jackson Laboratory.

### 1151 **SARS-CoV-2 Infection and Treatment Conditions**

1152 For all in vivo experiments, the 6 to 8 weeks male and female mice were intranasally challenged  
1153 with  $1 \times 10^5$  FFU in 25-30  $\mu$ L volume under anesthesia (0.5 - 5 % isoflurane delivered using  
1154 precision Dräger vaporizer with oxygen flow rate of 1 L/min). For Nab treatment using  
1155 prophylaxis regimen, mice were treated with 250  $\mu$ g (12.5 mg/kg body weight) of indicated  
1156 antibodies (CV3-1 or CV3-25 GASDALIE) via intraperitoneal injection (i.p.) 24 h prior to  
1157 infection. The starting body weight was set to 100 %. For survival experiments, mice were  
1158 monitored every 6-12 h starting six days after virus administration. Lethargic and moribund mice  
1159 or mice that had lost more than 20% of their body weight were sacrificed and considered to  
1160 have succumbed to infection for Kaplan-Meier survival plots.

### 1161 **Focus Forming Assay**

1162 Titers of virus stocks was determined by standard plaque assay. Briefly, the  $4 \times 10^5$  Vero-E6  
1163 cells were seeded on 12-well plate. 24 h later, the cells were infected with 200  $\mu$ L of serially  
1164 diluted virus stock. After 1 hour, the cells were overlaid with 1ml of pre-warmed 0.6% Avicel  
1165 (RC-581 FMC BioPolymer) made in complete RPMI medium. Plaques were resolved at 48 h  
1166 post infection by fixing in 10 % paraformaldehyde for 15 min followed by staining for 1 hour with  
1167 0.2 % crystal violet made in 20 % ethanol. Plates were rinsed in water to visualize plaques.

### 1168 **Measurement of Viral Burden**

1169 Indicated organs (nasal cavity, brain, lungs from infected or uninfected mice were collected,  
1170 weighed, and homogenized in 1 mL of serum free RPMI media containing penicillin-  
1171 streptomycin and homogenized in 2 mL tube containing 1.5 mm Zirconium beads with BeadBug  
1172 6 homogenizer (Benchmark Scientific, TEquipment Inc). Virus titers were measured using three  
1173 highly correlative methods. First, the total RNA was extracted from homogenized tissues using  
1174 RNeasy plus Mini kit (Qiagen Cat # 74136), reverse transcribed with iScript advanced cDNA kit  
1175 (Bio-Rad Cat #1725036) followed by a SYBR Green Real-time PCR assay for determining  
1176 copies of SARS-CoV-2 N gene RNA using primers SARS-CoV-2 N F: 5'-  
1177 ATGCTGCAATCGTGCTACAA-3' and SARS-CoV-2 N R: 5'-GACTGCCGCCTCTGCTC-3'.

1178 Second, serially diluted clarified tissue homogenates were used to infect Vero-E6 cell culture  
1179 monolayer. The titers per milligram of tissue were quantified using standard plaque forming  
1180 assay described above.

### 1181 **Analyses of Signature Inflammatory Cytokines mRNA**

1182 Brain and lung samples were collected from mice at the time of necropsy. Approximately, 20 mg  
1183 of tissue was suspended in 500  $\mu$ L of RLT lysis buffer, and RNA was extracted using RNeasy  
1184 plus Mini kit (Qiagen Cat # 74136), reverse transcribed with iScript advanced cDNA kit (Bio-Rad  
1185 Cat #1725036). To determine levels of signature inflammatory cytokines, multiplex qPCR was  
1186 conducted using iQ Multiplex Powermix (Bio Rad Cat # 1725848) and PrimePCR Probe Assay  
1187 mouse primers FAM-GAPDH, HEX-IL6, TEX615-CCL2, Cy5-CXCL10, and Cy5.5-IFN $\gamma$ .  
1188 The reaction plate was analyzed using CFX96 touch real time PCR detection system. Scan  
1189 mode was set to all channels. The PCR conditions were 95 °C 2 min, 40 cycles of 95 °C for 10 s  
1190 and 60 °C for 45 s, followed by a melting curve analysis to ensure that each primer pair resulted  
1191 in amplification of a single PCR product. mRNA levels of Il6, Ccl2, Cxcl10 and Ifng in the cDNA  
1192 samples of infected mice were normalized to Gapdh with the formula  $\Delta C_i(\text{target gene})=C_i(\text{target}$

1193 gene)-C<sub>i</sub>(Gapdh). The fold increase was determined using  $2^{-\Delta\Delta Ct}$  method comparing treated  
1194 mice to uninfected controls.

### 1195 **Virus-Cell Fusion Inhibition Assay**

1196 The split nanoluc assay was used to measure antibody-mediated inhibition of virus-cell fusion  
1197 (Yamamoto et al., 2019; Lu et al., 2020). Pseudoviruses decorated with SARS-CoV-2 Spike  
1198 were prepared by transfecting HEK293T cells (70% confluent 10 cm dishes) with a plasmid  
1199 mixture of 5 µg of psPAX2 (Gag-pol, Rev, and Tat expression vector; does not express Vpr), 5  
1200 µg of pCMV-d19 Spike (last 19 residues at C-terminal were deleted) from the B.1.1.7 variant or  
1201 WH01 G614, and 2 µg of a pCAGGS-Cyclophilin A-HiBiT construct using polyetherimide (PEI).  
1202 Two days post transfection, virus containing supernatants were clarified using a 0.45 µm PDVF  
1203 filter (Pall Corp, NY, USA # 4614) and pelleted by ultracentrifugation on a 15% sucrose cushion  
1204 before resuspension in culture media to achieve a 20X concentration over the original volume.  
1205 Freshly prepared viruses were incubated for 2 hours at 37°C with triplicate, 10-fold serial  
1206 dilutions of CV3-25 antibody or non-specific IgG (Jackson ImmunoResearch, PA, USA # 305-  
1207 005-003) in a white, flat bottom 96 well plate (Greiner Bio-One, NC, USA # 655083).  
1208 HEK293T-ACE2 target cells were transfected in a 24 well plate using PEI with 500ng/well of  
1209 pMX Puro PH-LgBiT (LgBiT-tagged to pleckstrin homology domain of human phospholipase Cδ  
1210 the N terminus). 1 day post transfection, cells were resuspended at  $2 \times 10^6$  cells/ml in culture  
1211 media containing Nano-Glo® Endurazine Live Cell Substrate™ (Promega Inc, WI, USA #  
1212 N2571) and DrkBiT (Promega Inc, WI, USA # CS3002A01) according to the manufacturer's  
1213 recommended concentrations and incubated for 2 hours at 37°C. Labelled target cells were  
1214 passed through a 70 µm cell strainer and added to the virus + antibody dilution plate ( $10^5$   
1215 cells/well). The assay plate was then incubated for 1 hour at 37°C before measuring  
1216 luminescence with a Tristar multiwell luminometer (Berthold Technology, Bad Wildbad,  
1217 Germany). %RLU was calculated by normalizing RLU values to wells without virus (min) and  
1218 wells without antibody (max).

### 1219 **smFRET Imaging of S on SARS-CoV-2 VLPs**

1220 Lentiviruses carrying SARS-CoV-2 spikes were prepared similarly as previously described (Lu  
1221 et al., 2020). Two short peptides labeling tags (Q3: GQQQLG; A4: DSLDMLEM) were  
1222 introduced into designed positions in the S1 subunit on the plasmid encoding S<sub>B.1.1.7</sub>, pCMV-  
1223 S<sub>B.1.1.7</sub>. Plasmids pCMV-S<sub>B.1.1.7</sub>, dual-tagged pCMV-S<sub>B.1.1.7</sub> Q3-1 A4-1, and pCMV delta R8.2  
1224 were transfected into 293T cells at a ratio of 20:1:21. Using this very diluted ratio of tagged-S vs.  
1225 wildtype S, for the virus particles containing tagged S, more than 95 % S trimers will have one  
1226 dual-tagged protomer and two wildtype protomers within a trimer. Using this strategy, we  
1227 generated lentiviral particles with an average of one dual-tagged S protomer for conjugating  
1228 FRET-paired fluorophores among predominantly wildtype S trimers presented on lentivirus  
1229 surface. Viral particles were harvested 40 h post-transfection, filtered with a 0.45 µm pore size  
1230 filter, and partially purified using ultra-centrifugation at 25,000 rpm for 2 h through a 15 %  
1231 sucrose cushion made in PBS. Then the particles were re-suspended in 50 mM pH 7.5 HEPES  
1232 buffer, labeled with self-healing Cy3 and Cy5 derivatives (LD555-CD and LD650-CoA,  
1233 respectively) and purified through an Optiprep™ (Sigma Aldrich) gradient as previously  
1234 described (Lu et al., 2019; Lu et al., 2020; Munro et al., 2014). smFRET images of viral particles  
1235 was acquired on a home-built prism-based total internal reflection fluorescence (TIRF)  
1236 microscope, as described previously (Lu et al., 2020). The conformational effects of 50 µg/ml  
1237 CV3-1 and CV3-25 antibodies on SARS-CoV-2 spike were tested by pre-incubating  
1238 fluorescently labeled viruses for 60 mins at 37°C before imaging in the continued presence of  
1239 the antibodies. Signals were simultaneously recorded on two synchronized ORCA-Flash4.0 V3  
1240 sCMOS cameras (Hamamatsu) at 25 frames per second for 80 seconds. smFRET data analysis  
1241 was performed using MATLAB (MathWorks)-based customized SPARTAN software package

1242 (Juette et al., 2016). Each FRET histogram was fitted into the sum of four Gaussian distributions  
1243 in Matlab, where each Gaussian distribution represents one conformation and the area under  
1244 each Gaussian curve estimates the occupancy of each state.

### 1245 **Recombinant Protein Expression and Purification**

1246 FreeStyle 293-F (Thermo Fisher) cells were grown to a density of  $1 \times 10^6$  cells/mL at 37°C with 8%  
1247 CO<sub>2</sub> with regular 135 rpm agitation. A plasmid encoding for non-cleavable, pre-fusion-stabilized  
1248 SARS-CoV-2 S ectodomain (1-1208) (HexaPro, S-6P (Hsieh et al., 2020; Wrapp et al., 2020) - a  
1249 gift from Dr. Jason S. McLellan) with a removable C-terminal twin-strep tag was transfected into  
1250 cells with EndoFectin Max (GeneCopoeia) using the manufacturer's protocol. One-week post-  
1251 transfection, the clarified supernatant was purified on strep-tactin resin (IBA) followed by size-  
1252 exclusion chromatography on a Superose 6 10/300 column (GE Healthcare) equilibrated with 10  
1253 mM Tris-HCl pH 8.0 and 200 mM NaCl as the running buffer (SEC buffer). The C-terminal twin-  
1254 Strep-Tag was removed by HRV3C (Sigma Aldrich) digestion overnight at 4 °C and the  
1255 uncleaved protein was removed by passage over Ni-NTA resin. The cleaved protein was further  
1256 purified on a Superose 6 10/300 column in SEC buffer. Alternatively, cells were transfected with  
1257 a plasmid coding for SARS-CoV-2 RBD or ACE2-Fc and were purified on Ni-NTA resin  
1258 (Invitrogen) or Protein A resin (Cytiva), respectively. Protein purity was confirmed by SDS-  
1259 PAGE. Only freshly isolated protein was used for Cryo-EM grid preparations.

1260 Expression plasmids encoding the heavy and light chains of CV3-1 IgG or CV3-25 IgG were  
1261 transiently transfected into Expi293F cells (Thermo Fisher) with ExpiFectamine 293 transfection  
1262 reagent using the manufacturer's protocol (Thermo Fisher). After 6-days post transfection,  
1263 antibody was purified on Protein A resin from cell supernatant (Thermo Fisher). Fab was  
1264 generated by overnight papain digestion at 37°C using immobilized papain agarose (Thermo  
1265 Fisher). Fab was separated from Fc and uncleaved IgG by passage over protein A resin  
1266 followed by size-exclusion chromatography on a Superose 6 10/300 column before being used  
1267 in SPR binding, X-Ray crystallography or Cryo-EM experiments.

### 1268 **Surface Plasmon Resonance**

1269 All surface plasma resonance assays were performed on a Biacore 3000 (GE Healthcare) with  
1270 a running buffer of 10 mM HEPES pH 7.5 and 150 mM NaCl supplemented with 0.05% Tween  
1271 20 at 25°C. Initial peptide scanning was performed by the binding of a series of SARS-CoV-2 S2  
1272 synthetic peptides (GenScript) to immobilized CV3-25 IgG (~5800 RU) on a Protein A sensor  
1273 chip (Cytiva). For the kinetic binding measurements of S2 peptides #289 (15-mer), #289 (11-  
1274 mer) and the 26mer (1140-1165) to CV3-25, ~5800 RU of CV3-25 IgG was first immobilized on  
1275 a protein A chip (Cytiva) and 2-fold serial dilutions of the S2 peptides were then injected with  
1276 concentrations ranging from 6.25 to 200 nM. After each cycle the protein A sensor chip was  
1277 regenerated with 0.1 M Glycine pH 2.0. CV3-1 IgG was used as a negative control. All  
1278 sensorgrams were corrected by subtraction of the corresponding blank channel in addition to  
1279 the buffer background and the kinetic constant determined using a 1:1 Langmuir model with the  
1280 BIAevaluation software (GE Healthcare). Goodness of fit of the curve was evaluated by the Chi<sup>2</sup>  
1281 value with a value below 3 considered acceptable.

### 1282 **Cryo-EM Sample Preparation and Data Collection**

1283 The purified non-tagged SARS-CoV-2 HexaPro spike (293F produced) was incubated with 20-  
1284 fold excess of CV3-25 Fab overnight at 4°C before purification on a Superose 6 300/10 GL  
1285 column (GE Healthcare). The complex peak was harvested, concentrated to about 0.5 mg/mL in  
1286 SEC buffer and immediately used for CryoEM grid preparation. 3 $\mu$ L of protein was deposited on  
1287 a holey copper grids (QUANTIFOIL R 1.2/1.3, 200 mesh, EMS) which had been glow-  
1288 discharged for 30s at 15 mA (Tedpella Inc). The grids were vitrified in liquid ethane using a

1289 *Vitrobot Mark IV (Thermo Fisher) with a blot time of 2-4 s and the blot force of 20 at 4 °C and 95%*  
1290 *humidity.*

1291 *Cryo-EM data from a good grid were acquired in 300kV Titan Krios electron microscope,*  
1292 *equipped with a Gatan K2-BioQuantum Image filter camera system (Thermo Fisher and Gatan*  
1293 *Inc.) in National Cancer Institute/NIH IRP cryoEM facility, Bethesda MD. 50-frame image stacks*  
1294 *were collected at a magnification of 165,000x, corresponding to a calibrated pixel size of 0.821*  
1295 *Å/pixel, with a total exposure dose of 59.3 e<sup>-</sup>/Å from 5s exposure.*

### 1296 **CryoEM Data Processing, Model building and Analysis**

1297 *Motion correction, CTF estimation, particle picking, curation and extraction, 2D classification, ab*  
1298 *initio model reconstruction, volume refinements and local resolution estimation were carried out*  
1299 *in cryoSPARC (Punjani et al., 2017; Rubinstein and Brubaker, 2015). An initial SARS-CoV-2*  
1300 *spike model (PDB: 6XKL (Hsieh et al., 2020)) with single-RBD up was used as a modeling*  
1301 *template. The NTDs were initially modelled from PDB entry 7LY3(McCallum et al., 2021). The*  
1302 *initial docking model for CV3-25 Fab was taken from the crystallography model in this study.*

1303 *Automated and manual model refinements were iteratively carried out in ccpEM (Burnley et al.,*  
1304 *2017), Phenix (real-space refinement) (Liebschner et al., 2019) and Coot(Emsley and Cowtan,*  
1305 *2004). Geometry validation and structure quality evaluation were performed by EM-Ringer*  
1306 *(Barad et al., 2015) and Molprobit (Chen et al., 2010). Model-to-map fitting cross correlation*  
1307 *and figures generation were carried out in USCF Chimera, Chimera X (Goddard et al., 2018;*  
1308 *Pettersen et al., 2004; Pettersen et al., 2021) and PyMOL (The PyMOL Molecular Graphics*  
1309 *System, Version 2.0 Schrödinger, LLC.). The complete cryoEM data processing workflow is*  
1310 *shown in Figure S2 and statistics of data collection, reconstruction and refinement is described*  
1311 *in Table S2.*

### 1312 **Crystallization and Structure Determination of CV3-25 with S2 Stem Peptide**

1313 *CV3-25 Fab was prepared and purified as described(Ullah et al., 2021). 10 mg/mL of CV3-25*  
1314 *was mixed with synthetic S2 peptide spanning residues 1153-1163, 1153-1167 or 1140-1165*  
1315 *(26mer) in a 1:10 molar ratio of Fab to peptide. Crystal screening of Fab-peptide complexes*  
1316 *were performed using the vapor-diffusion hanging drop method using the sparse matrix*  
1317 *crystallization screens ProPlex (Molecular Dimensions), Index (Hampton Research), or Crystal*  
1318 *Screen I and II (Hampton Research) with a 1:1 ratio of protein to well solution. After*  
1319 *approximately 2 weeks incubation at 21 °C, diffraction-quality co-crystals of the Fab-26mer were*  
1320 *obtained in 0.1 M sodium citrate pH 5.6, 20% PEG4000 and 20% isopropanol. Crystals were*  
1321 *snap-frozen in the crystallization condition supplemented with 20% 2-methyl-2, 4-pentanediol*  
1322 *(MPD) as the cryoprotectant. X-ray diffraction data was collected at the SSRL beamline 9-2 and*  
1323 *was processed with HKL3000(Minor et al., 2006). The structure was solved by molecular*  
1324 *replacement in Phenix(Liebschner et al., 2019) using a CV3-25 framework model generated by*  
1325 *SAbPred(Dunbar et al., 2016). Iterative cycles of model building and refinement were done in*  
1326 *Coot(Emsley and Cowtan, 2004) and Phenix. Structural analysis and figure generation were*  
1327 *performed in PyMOL and ChimeraXFab-peptide interface and buried surface area were*  
1328 *determined in PISA(Krissinel and Henrick, 2007). Data collection and refinement statistics are*  
1329 *shown in Table 1.*

### 1330 **Flow Cytometry Analysis of Cell-Surface Staining**

1331 *Using the standard calcium phosphate method, 10 µg of Spike expressor and 2 µg of a green*  
1332 *fluorescent protein (GFP) expressor (pIRES2-eGFP; Clontech) was transfected into 2 × 10<sup>6</sup>*  
1333 *293T cells. At 48h post transfection, 293T cells were stained with anti-Spike monoclonal*  
1334 *antibodies CV3-25, CV3-1 (5 µg/mL) or using the ACE2-Fc chimeric protein (20 µg/mL) for 45*

1335 *min at 37°C. Alternatively, to determine the Hill coefficients (Anand et al., 2020), cells were*  
1336 *preincubated with increasing concentrations of CV3-25 or CV3-1 (0.04 to 20 µg/mL). Alexa*  
1337 *Fluor-647-conjugated goat anti-human IgG (H+L) Abs (Invitrogen) were used as secondary*  
1338 *antibodies to stain cells for 30 min at room temperature. The percentage of transfected cells*  
1339 *(GFP+ cells) was determined by gating the living cell population based on the basis of viability*  
1340 *dye staining (Aqua Vivid, Invitrogen). Samples were acquired on a LSRII cytometer (BD*  
1341 *Biosciences) and data analysis was performed using FlowJo v10.5.3 (Tree Star). Hill coefficient*  
1342 *analyses were done using GraphPad Prism version 9.1.0 (GraphPad). Alternatively, for peptide*  
1343 *epitope competition assay, CV3-25 (5µg/mL) was pre-incubated in presence of increasing*  
1344 *concentrations of peptide #288 (1149-KEELDKYFKNHTSPD-1163), peptide #289 (1153-*  
1345 *DKYFKNHTSPDVDLG-1167), a shorter version of peptide #289 (1153-DKYFKNHTSPD-1163)*  
1346 *or a scramble version of the peptide #289 (DHDTKFLNYDPVGKS), which were synthesized by*  
1347 *Genscript.*

### 1348 **Viral Neutralization Assay**

1349 *293T-ACE2 target cells were infected with single-round luciferase-expressing lentiviral particles*  
1350 *(Prévost et al., 2020). Briefly, 293T cells were transfected by the calcium phosphate method*  
1351 *with the lentiviral vector pNL4.3 R-E- Luc (NIH AIDS Reagent Program) and a plasmid encoding*  
1352 *for SARS-CoV-2 Spike at a ratio of 5:4. Two days post-transfection, cell supernatants were*  
1353 *harvested and stored at -80°C until further use. 293T-ACE2 target cells were seeded at a*  
1354 *density of  $1 \times 10^4$  cells/well in 96-well luminometer-compatible tissue culture plates (Perkin Elmer)*  
1355 *24h before infection. To measure virus neutralization, recombinant viruses in a final volume of*  
1356 *100 µL were incubated with increasing concentrations of CV3-1 or CV3-25 (0.01 to 10 µg/mL)*  
1357 *for 1h at 37°C and were then added to the target cells followed by incubation for 48h at 37°C;*  
1358 *cells were lysed by the addition of 30 µL of passive lysis buffer (Promega) followed by one*  
1359 *freeze-thaw cycle. An LB942 TriStar luminometer (Berthold Technologies) was used to measure*  
1360 *the luciferase activity of each well after the addition of 100 µL of luciferin buffer (15 mM MgSO<sub>4</sub>,*  
1361 *15 mM KH<sub>2</sub>PO<sub>4</sub> [pH 7.8], 1 mM ATP, and 1 mM dithiothreitol) and 50 µL of 1 mM D-luciferin*  
1362 *potassium salt (Prolume). The neutralization half-maximal inhibitory dilution (IC<sub>50</sub>) represents*  
1363 *the antibody concentration inhibiting 50% of the infection of 293T-ACE2 cells by recombinant*  
1364 *viruses bearing the indicated surface glycoproteins. Alternatively, for peptide epitope*  
1365 *competition assay, CV3-25 (10µg/mL) was pre-incubated in presence of increasing*  
1366 *concentrations of peptide #289 (1153-DKYFKNHTSPDVDLG-1167) or a scramble version of the*  
1367 *same peptide (DHDTKFLNYDPVGKS).*

### 1368 **Radioactive Labeling and Immunoprecipitation**

1369 *For pulse-labeling experiments,  $5 \times 10^5$  293T cells were transfected by the calcium phosphate*  
1370 *method with SARS-CoV-2 Spike expressors. One day after transfection, cells were*  
1371 *metabolically labeled for 16 h with 100 µCi/ml [<sup>35</sup>S]methionine-cysteine ([<sup>35</sup>S] protein labeling*  
1372 *mix; Perkin-Elmer) in Dulbecco's modified Eagle's medium lacking methionine and cysteine and*  
1373 *supplemented with 10% of dialyzed fetal bovine serum and 1X GlutaMAX<sup>TM</sup> (ThermoFisher*  
1374 *Scientific). Cells were subsequently lysed in radioimmunoprecipitation assay (RIPA) buffer (140*  
1375 *mM NaCl, 8 mM Na<sub>2</sub>HPO<sub>4</sub>, 2 mM NaH<sub>2</sub>PO<sub>4</sub>, 1% NP-40, 0.05% sodium dodecyl sulfate [SDS],*  
1376 *1.2mM sodium deoxycholate [DOC]) with protease inhibitors (ThermoFisher Scientific).*  
1377 *Precipitation of radiolabeled SARS-CoV-2 Spike glycoproteins from cell lysates or supernatant*  
1378 *was performed with CV3-25 in combination with a polyclonal rabbit antiserum raised against*  
1379 *SARS-CoV-2 RBD protein for 1 h at 4°C in the presence of 45 µL of 10% protein A-Sepharose*  
1380 *beads (GE Healthcare).*

### 1381 **Peptide Scanning ELISA**

1382 SARS-CoV-2 Spike peptide ELISA (enzyme-linked immunosorbent assay) The SARS-CoV-2  
1383 Spike ELISA assay used was adapted from a previously described ELISA (Prevost et al., 2020).  
1384 Peptides covering the entire SARS-CoV-2 S2 sequence with a length of 15 residues (15-mer)  
1385 and an overhang of 4 residues were purchased from JPT Peptide Technologies. Briefly, SARS-  
1386 CoV-2 S2 peptide pools or individual peptides (1 µg/ml), or bovine serum albumin (BSA) (1  
1387 µg/ml) as a negative control, were prepared in PBS and were adsorbed to plates (MaxiSorp;  
1388 Nunc) overnight at 4 °C. Coated wells were subsequently blocked with blocking buffer (Tris-  
1389 buffered saline [TBS] containing 0.1% Tween20 and 2% BSA) for 1 hour at room temperature.  
1390 Wells were then washed four times with washing buffer (TBS containing 0.1% Tween20). CV3-  
1391 25 mAb (50 ng/ml) was prepared in a diluted solution of blocking buffer (0.1 % BSA) and  
1392 incubated with the peptide-coated wells for 90 minutes at room temperature. Plates were  
1393 washed four times with washing buffer followed by incubation with HRP-conjugated anti-IgG  
1394 secondary Abs (Invitrogen) (diluted in a diluted solution of blocking buffer [0.4% BSA]) for 1 hour  
1395 at room temperature, followed by four washes. HRP enzyme activity was determined after the  
1396 addition of a 1:1 mix of Western Lightning oxidizing and luminol reagents (Perkin Elmer Life  
1397 Sciences). Light emission was measured with a LB942 TriStar luminometer (Berthold  
1398 Technologies). Signal obtained with BSA was subtracted for each plate.

### 1399 **Western Blotting**

1400 293T-S cells express the wild-type S glycoprotein from a SARS-CoV-2 Wuhan-Hu-1 strain  
1401 (Nguyen et al., 2021). 293T-S cells were seeded in 6-well plates at a density of  $1 \times 10^6$  cells per  
1402 well on day 0. On day 1, cells were either induced with 1 µg/ml doxycycline or mock treated as a  
1403 control. Two days after induction, cells were lysed with lysis buffer (1x PBS, 1% NP-40, 1x  
1404 protease inhibitor cocktail (Roche)). Cell lysates were subjected to Western blotting using the  
1405 CV3-1 or CV3-25 antibodies; mouse anti-S1 antibody (Sino Biological) and rabbit anti-S2  
1406 antibody (Sino Biological) were used as controls. The Western blots were developed with  
1407 horseradish peroxidase (HRP)-conjugated secondary antibodies (anti-human IgG, anti-mouse  
1408 IgG or anti-rabbit IgG, correspondingly). To evaluate antibody recognition of S glycoproteins  
1409 lacking N-linked glycans, 293T-S cells expressing the wild-type SARS-CoV-2 S glycoprotein  
1410 were lysed with lysis buffer, as described above. Lysates were treated with PNGase F (NEB)  
1411 following the manufacturer's instructions or mock treated as a control. The lysates were then  
1412 Western blotted with the CV3-25 antibody, as described above.

### 1413 **Quantification and Statistical Analysis**

1414 Data were analyzed and plotted using GraphPad Prism software (La Jolla, CA, USA). Statistical  
1415 significance for pairwise comparisons were derived by applying non-parametric Mann-Whitney  
1416 test (two-tailed). To obtain statistical significance for survival curves, grouped data were  
1417 compared by log-rank (Mantel-Cox) test. To obtain statistical significance for grouped data we  
1418 employed 2-way ANOVA followed by Tukey's multiple comparison tests.

1419 *p* values lower than 0.05 were considered statistically significant. *P* values were indicated as \*,  
1420  $p < 0.05$ ; \*\*,  $p < 0.01$ ; \*\*\*,  $p < 0.001$ ; \*\*\*\*,  $p < 0.0001$ .

### 1421 **Schematics**

1422 Schematics for showing experimental design in figures were created with BioRender.com.

1423

# Figure 1

## A

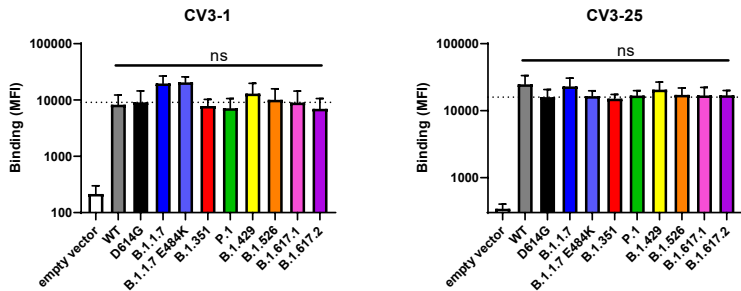

## B

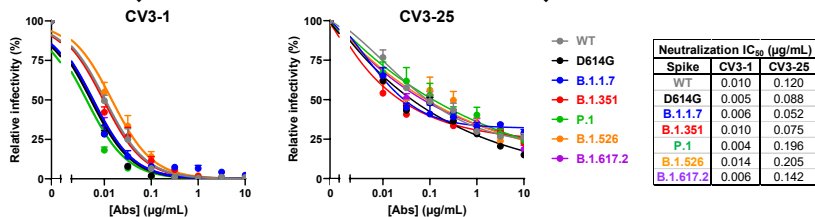

## C

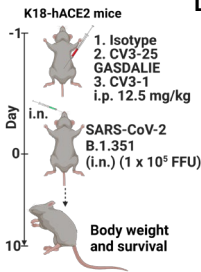

## D

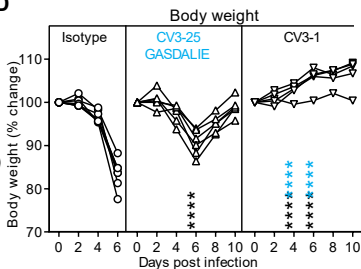

## E

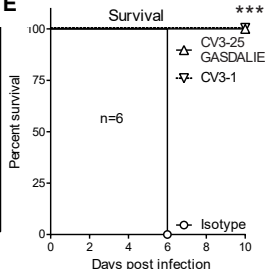

Figure 2

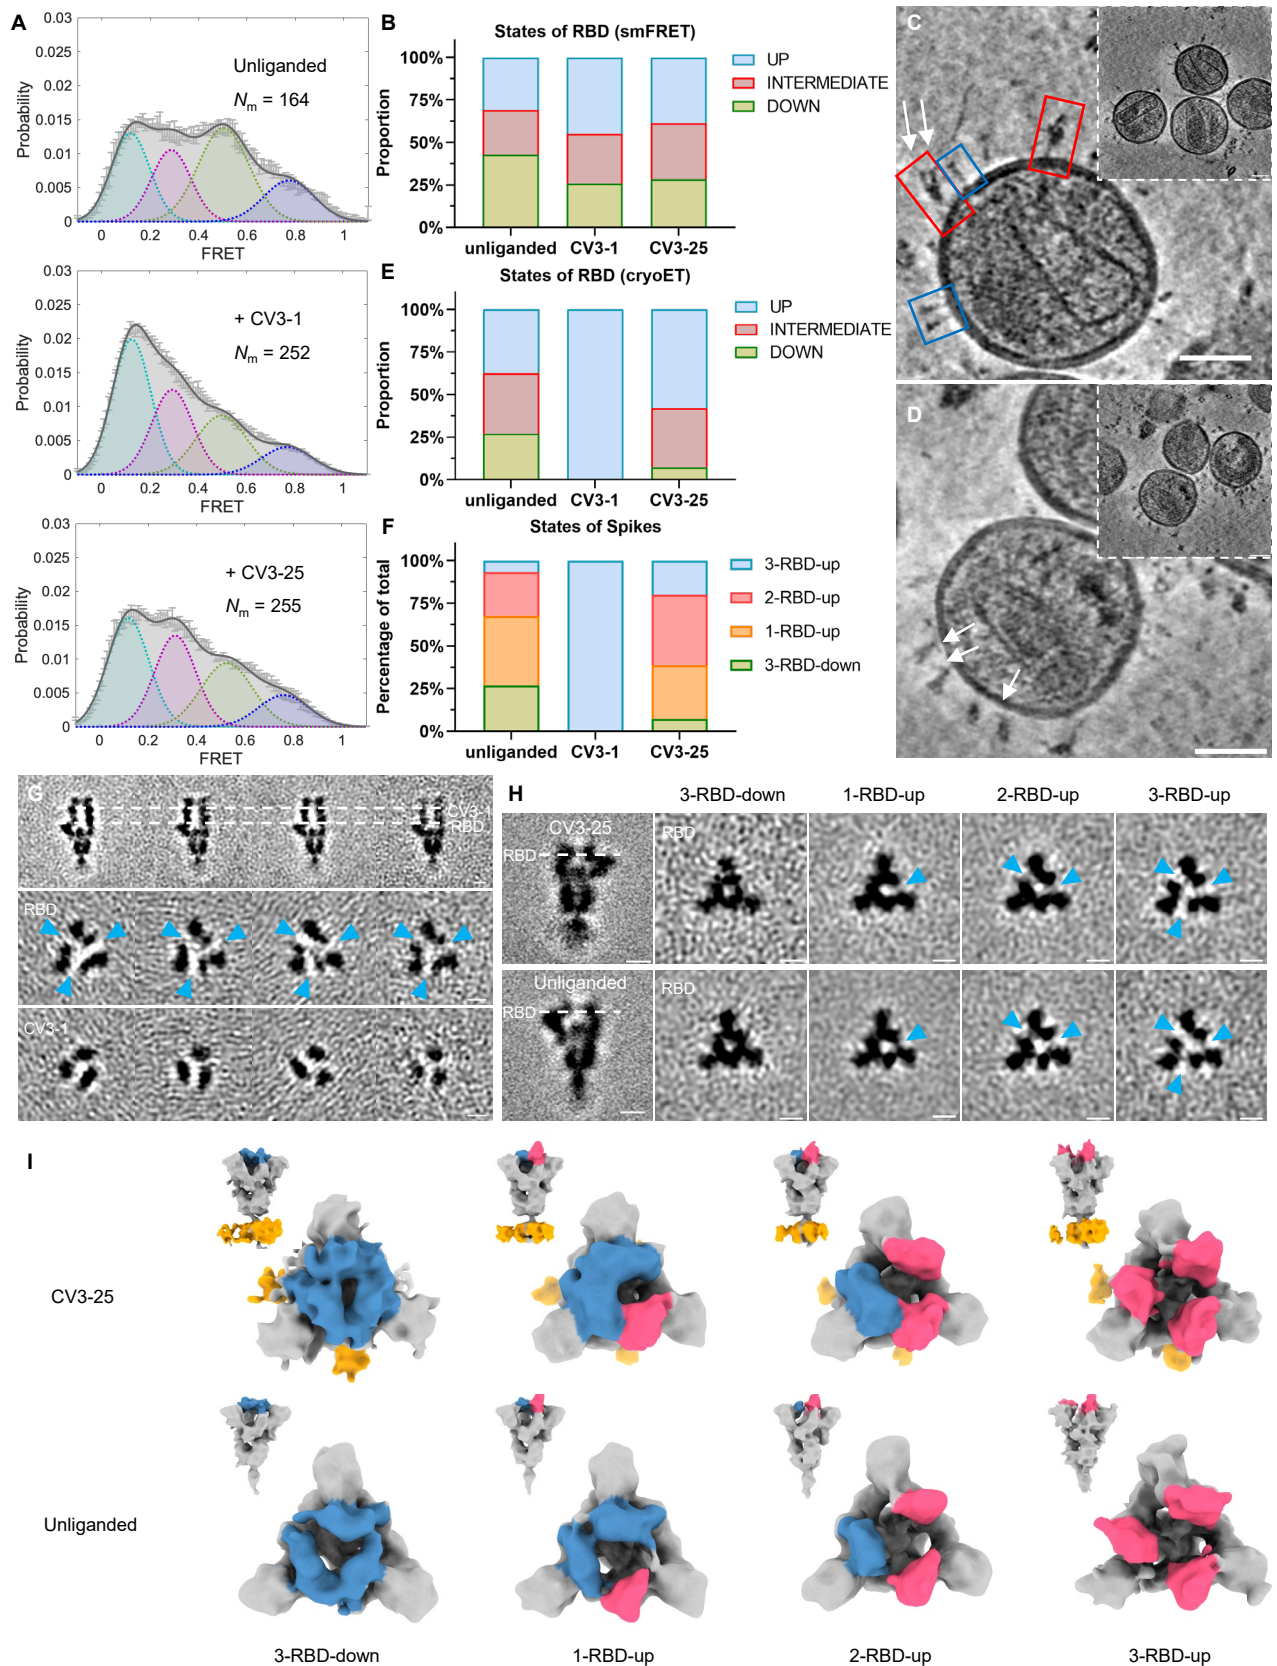



Figure 3

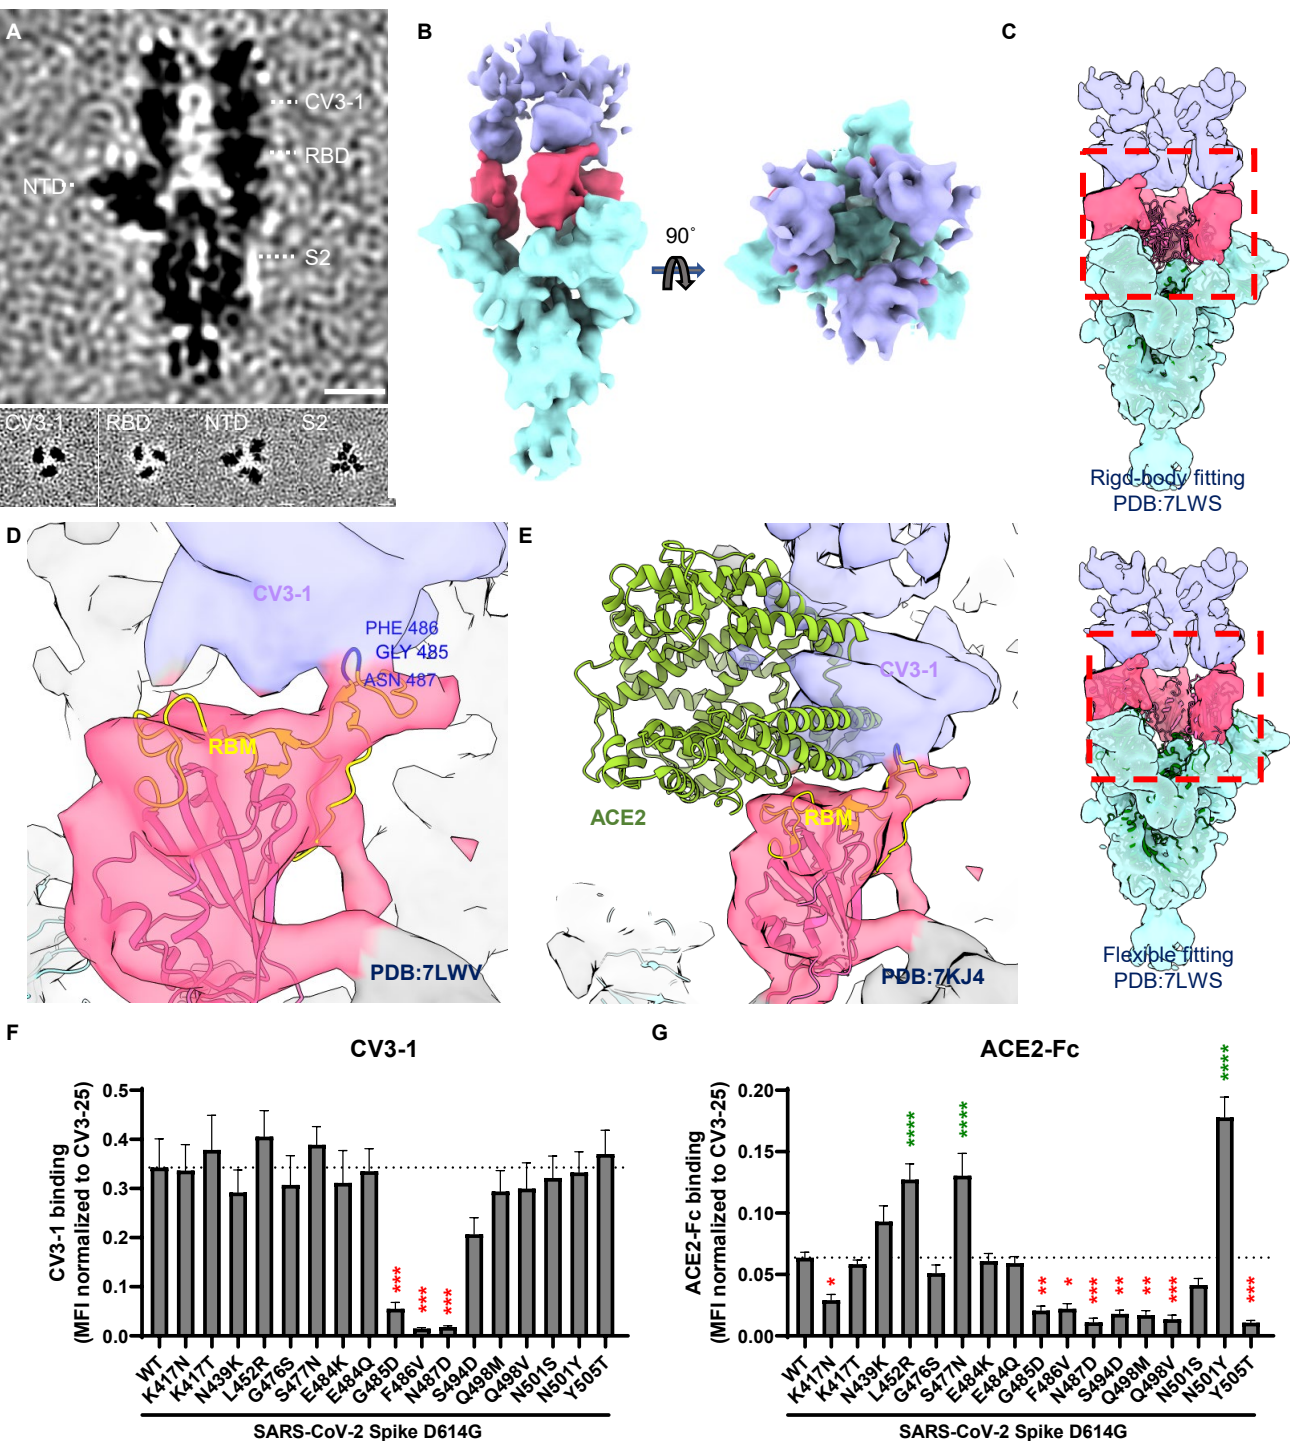

# Figure 4

**A**

|                | Virions | Perfusion Spikes |
|----------------|---------|------------------|
| B.1.1.7        | 345     | 9967             |
| B.1.1.7_CV3-1  | 298     | 1353             |
| B.1.1.7_CV3-25 | 299     | 7739             |

**B**

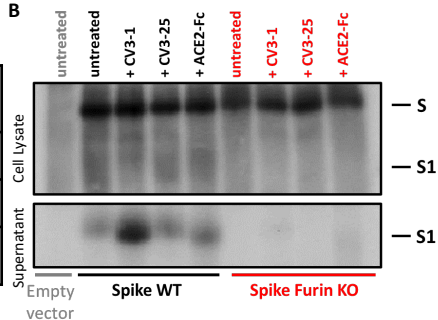

**C**

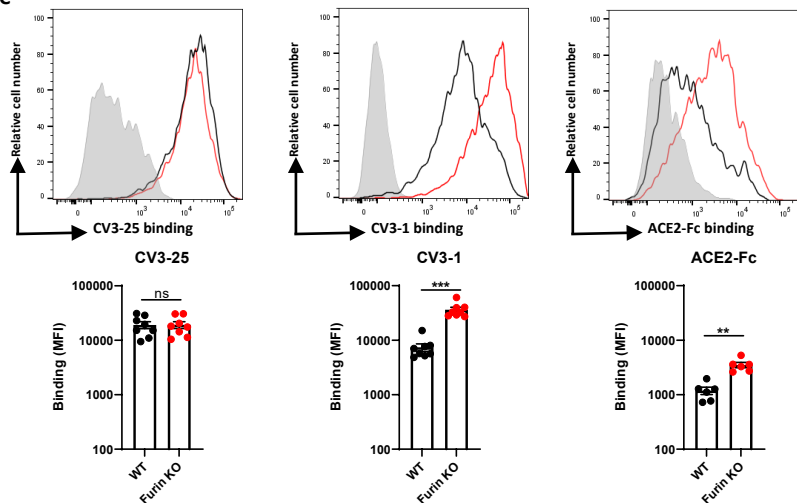

**D**

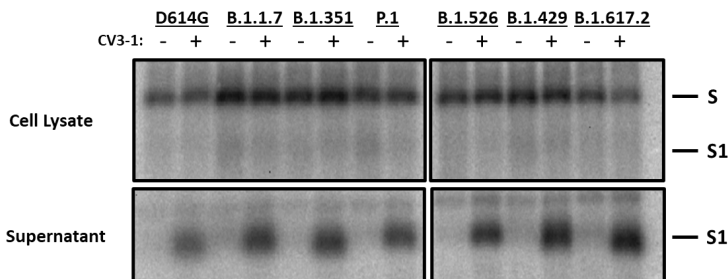

Figure 5

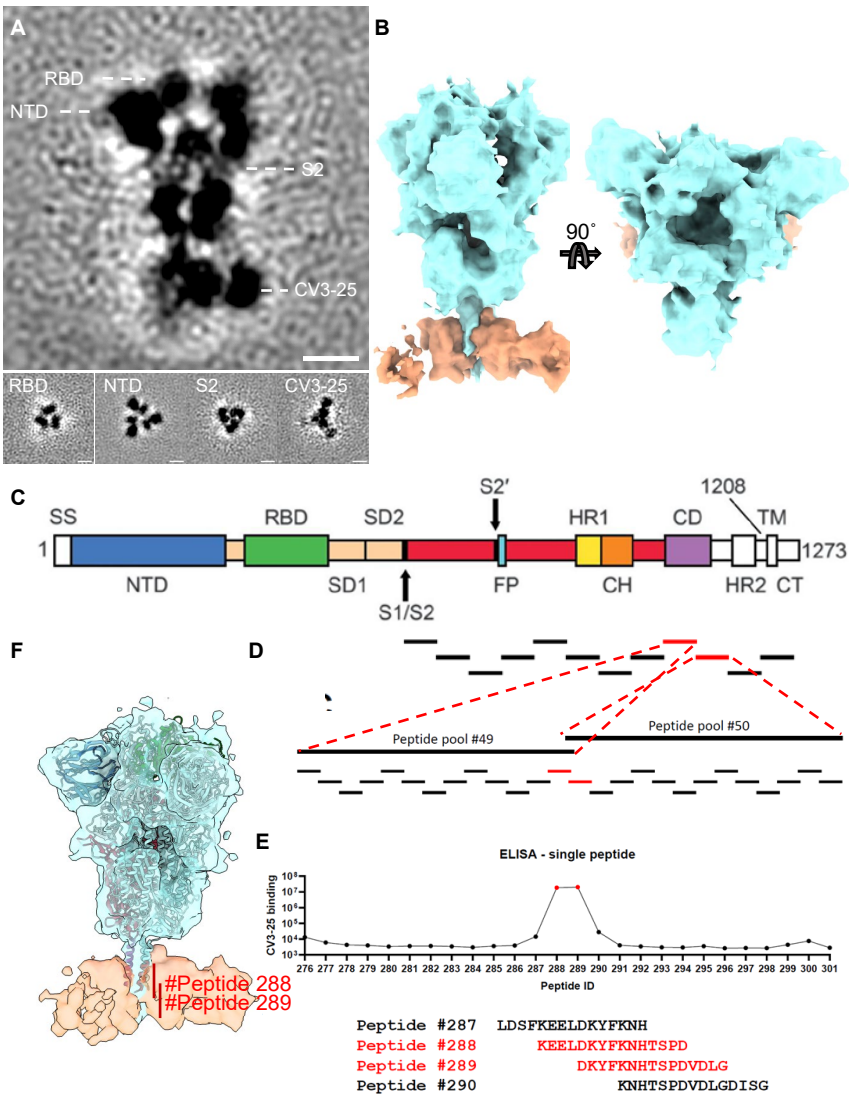

Figure 6

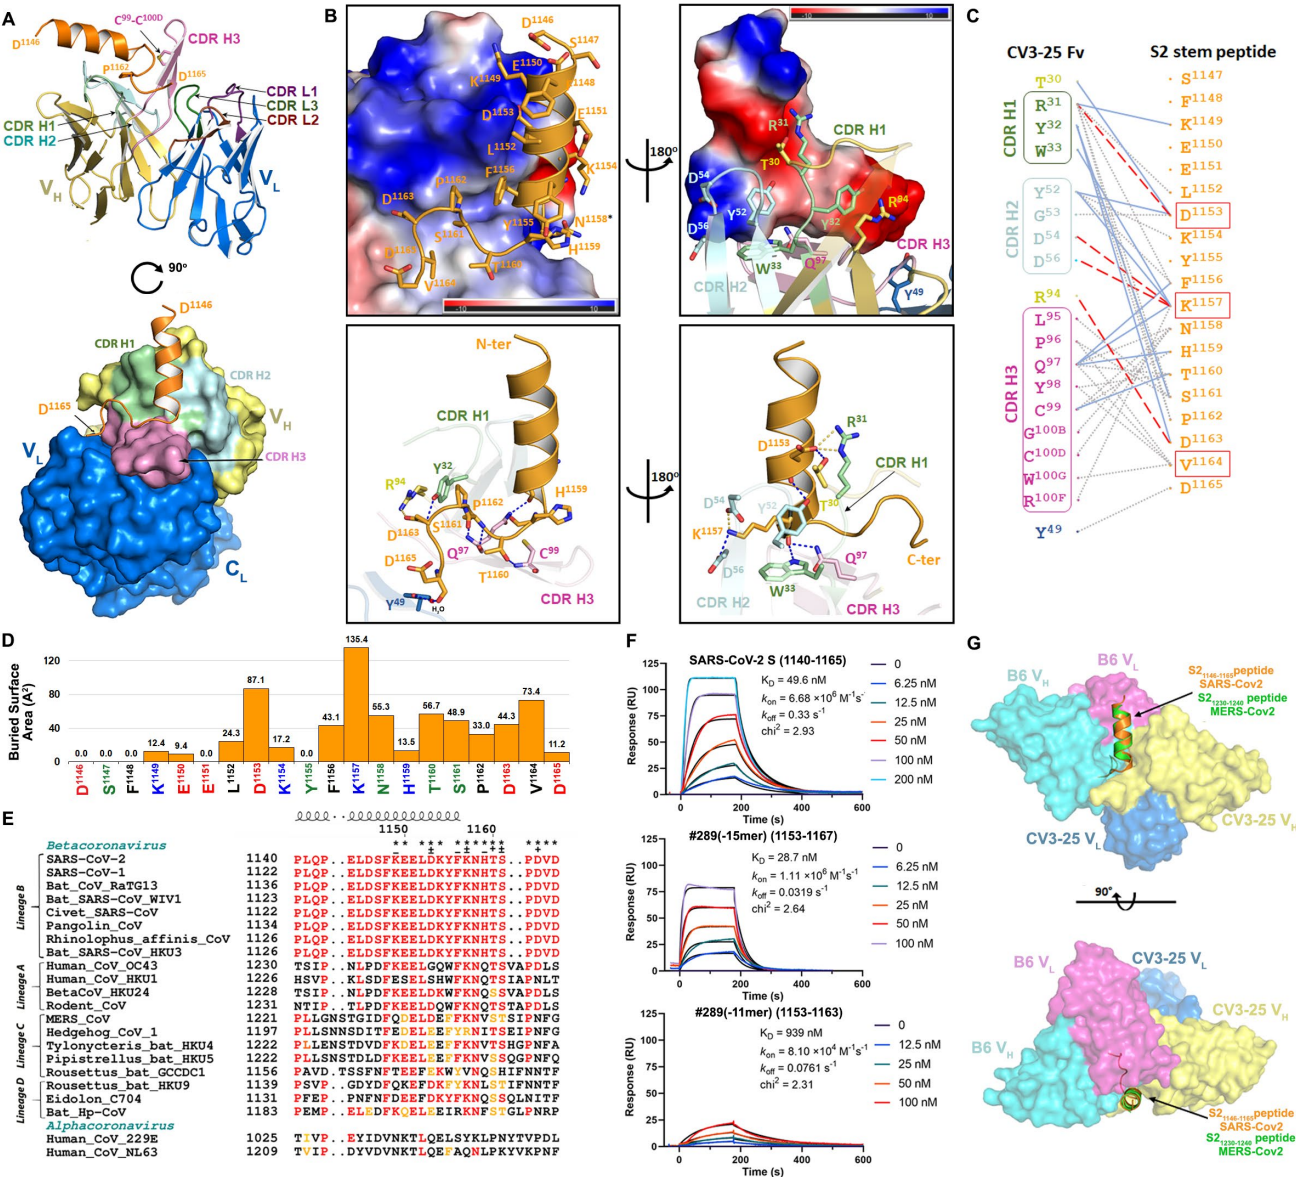

# Figure 7

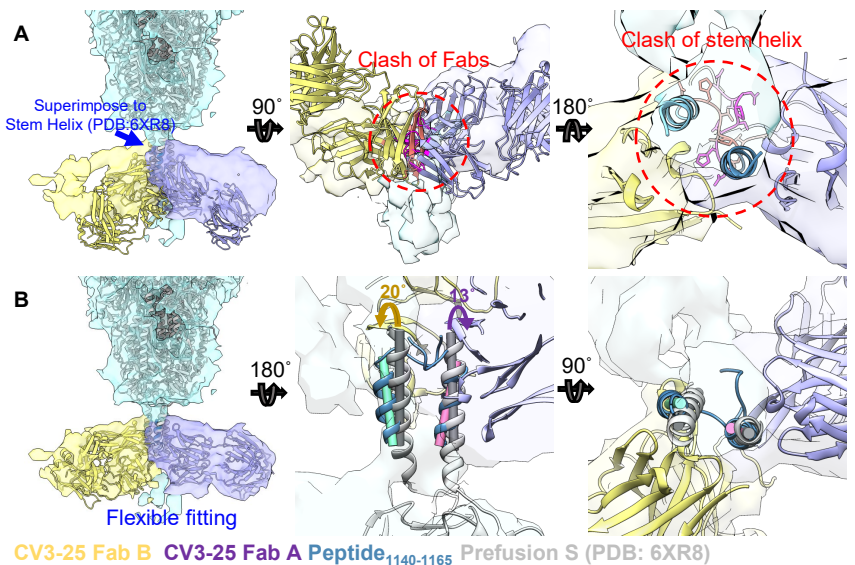

CV3-25 Fab B CV3-25 Fab A Peptide<sub>1140-1165</sub> Prefusion S (PDB: 6XR8)

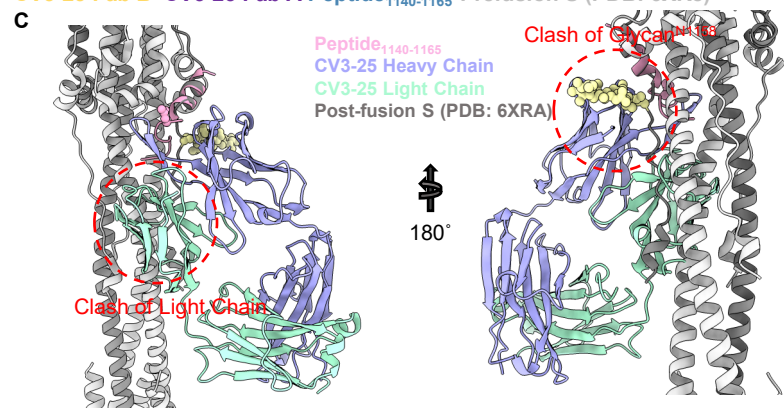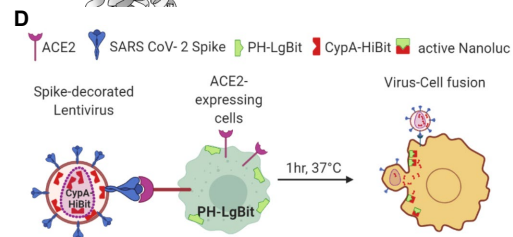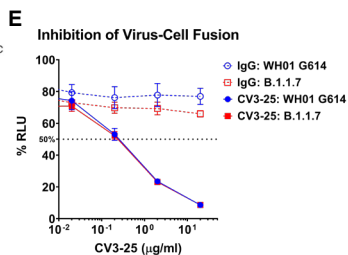

Figure S1

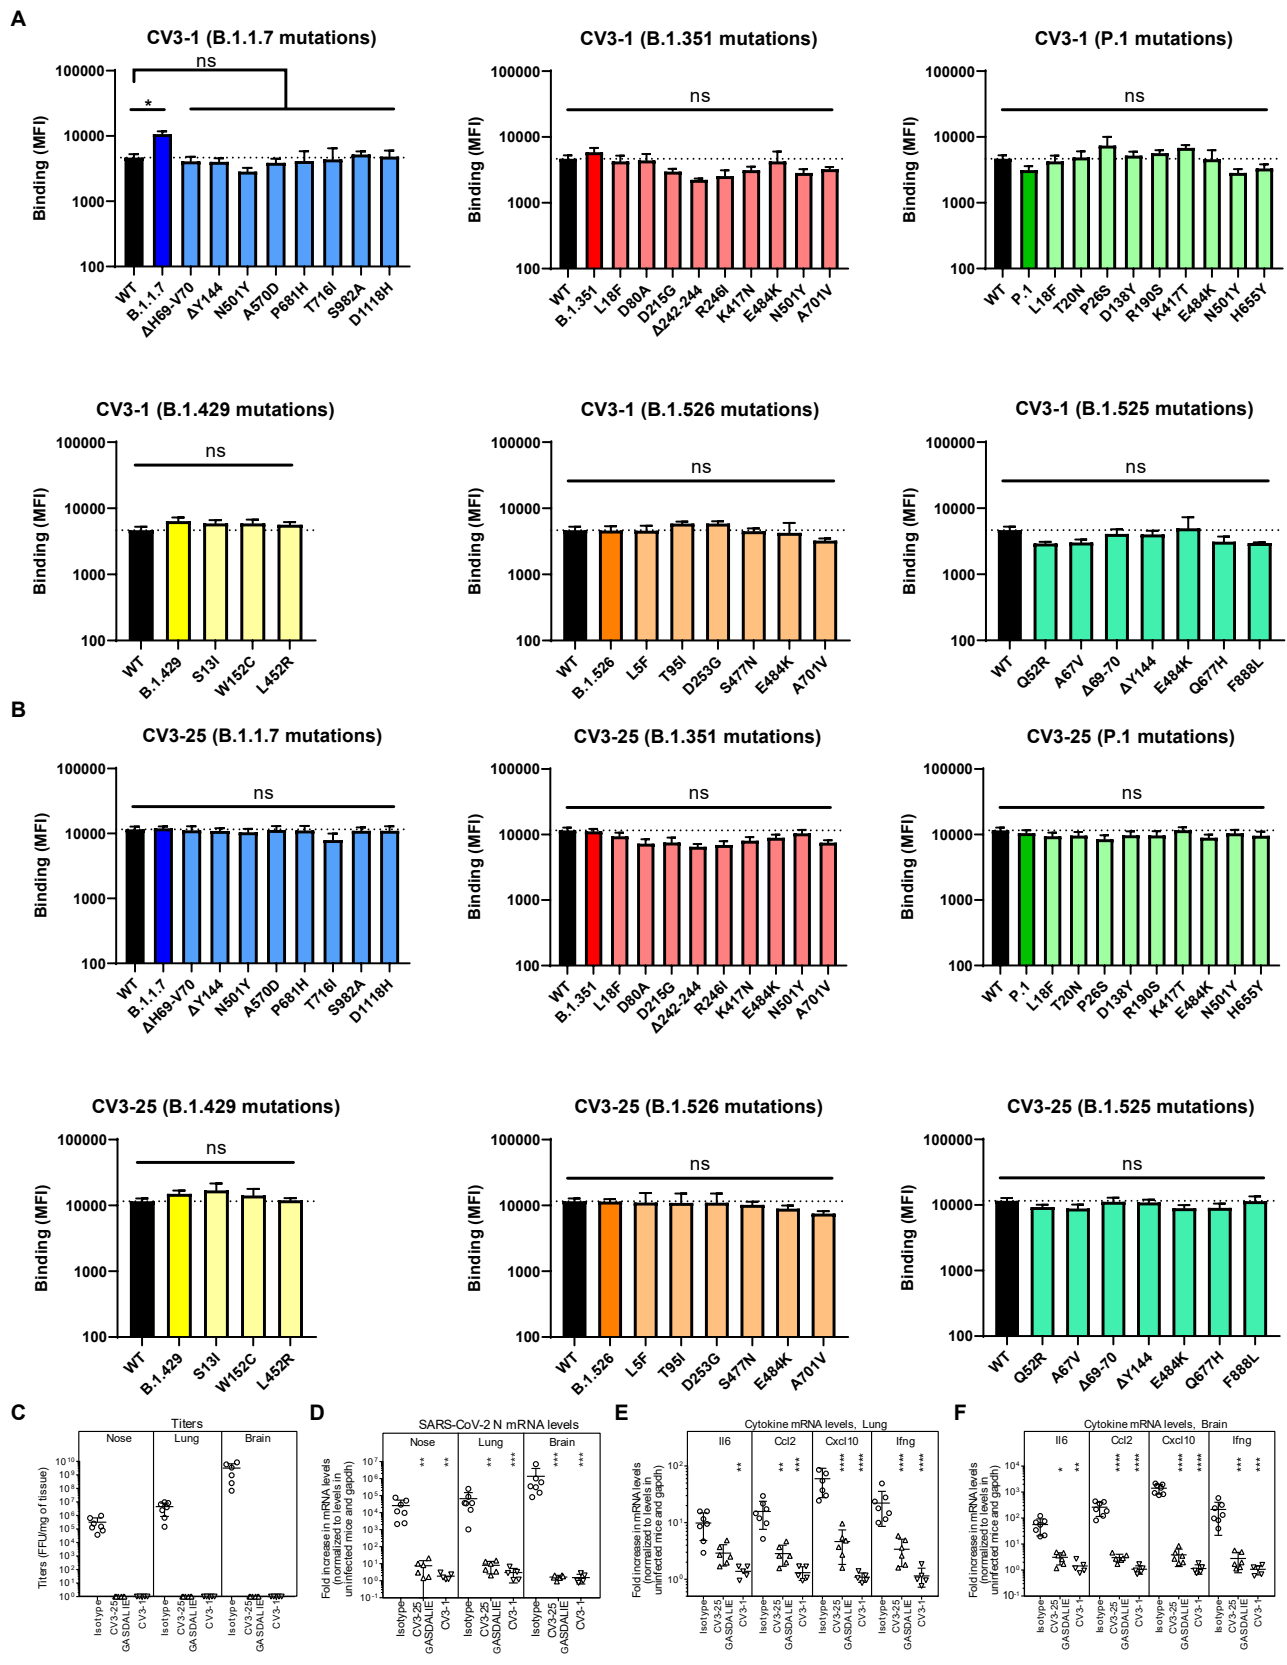

Figure S2

A

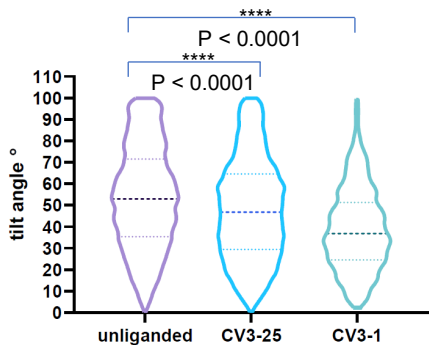

B

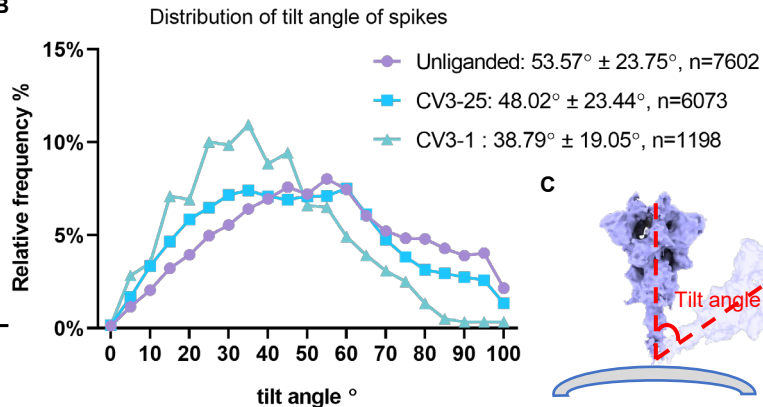

C

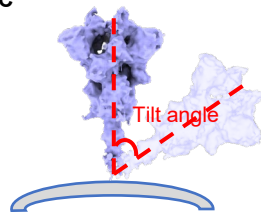

D

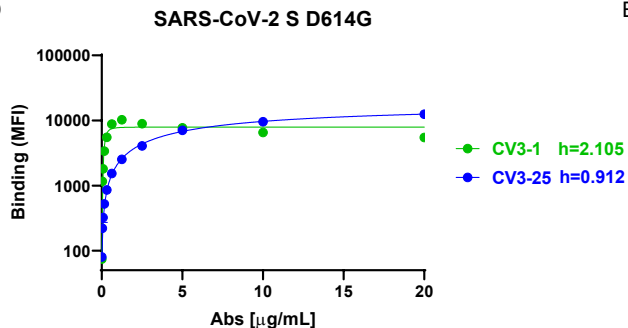

E

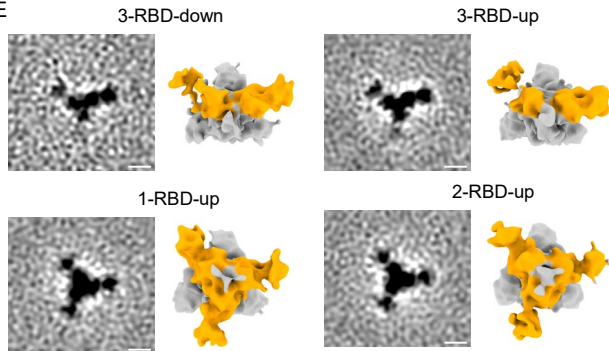

# Figure S3

**A**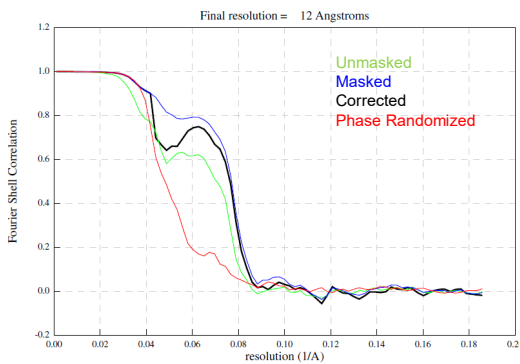**B**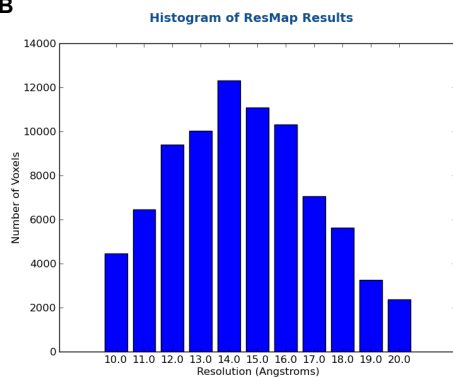**C**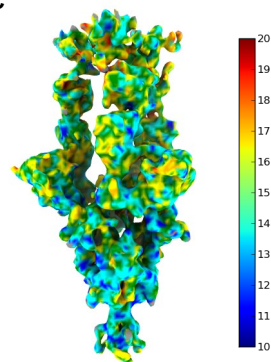**D**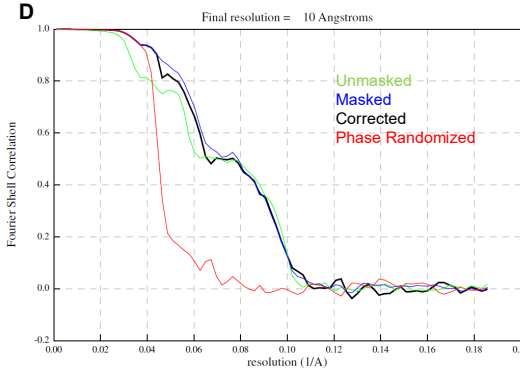**E**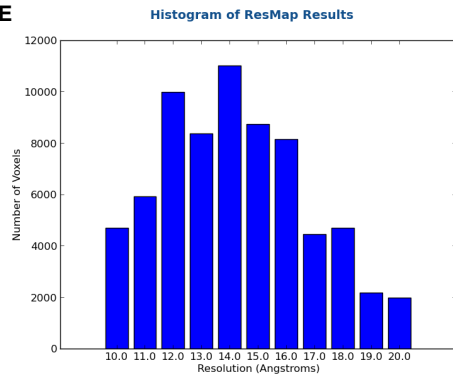**F**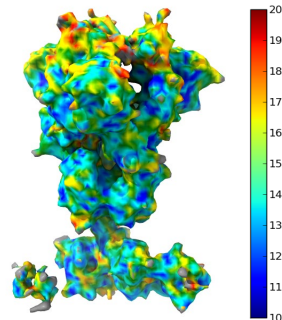**G**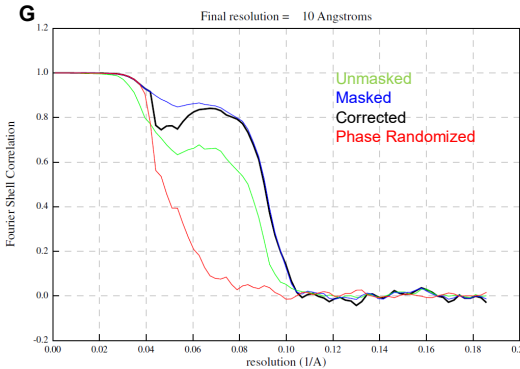**H**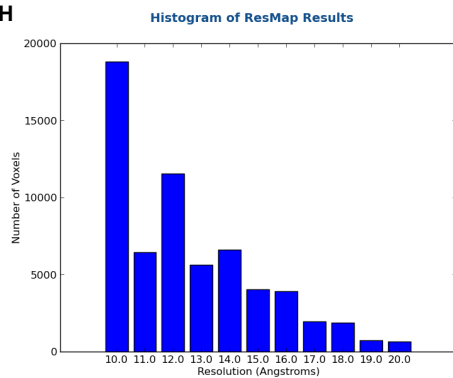**I**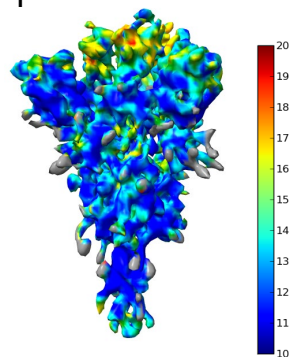



# Figure S4

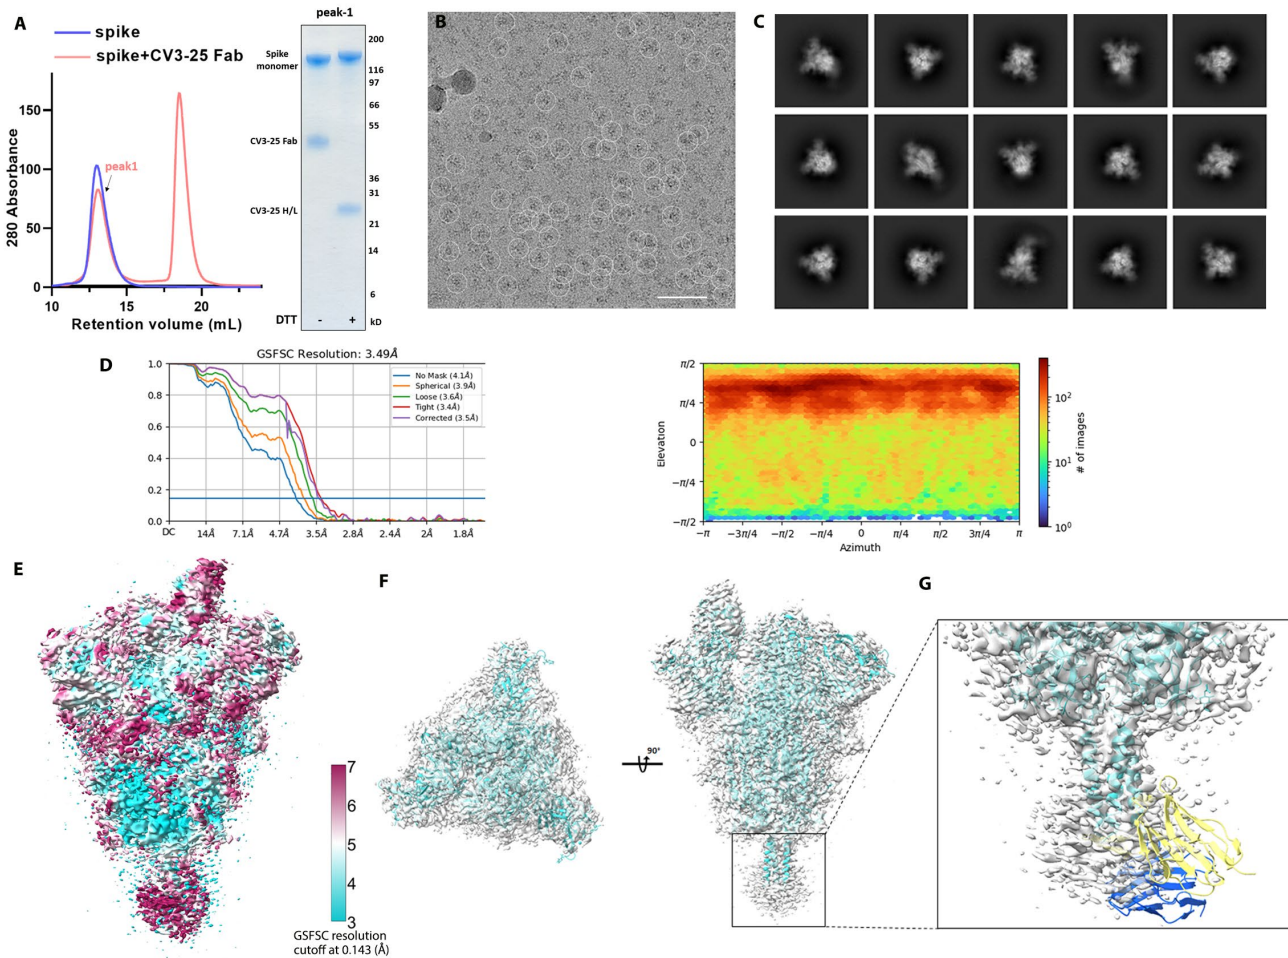

Figure S5

A

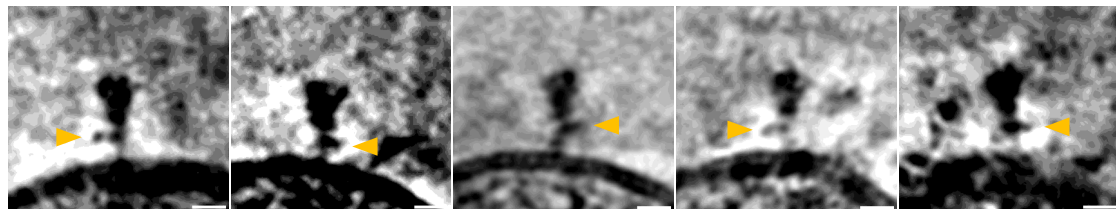

B

Two Fabs bound

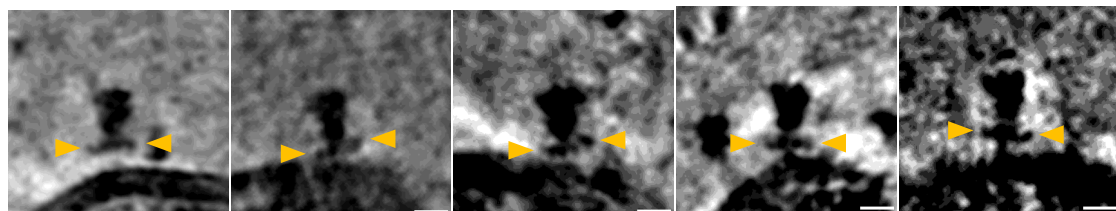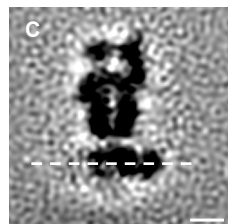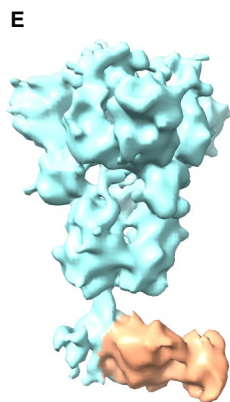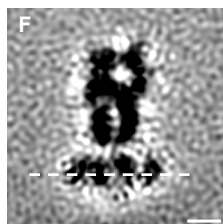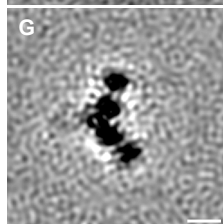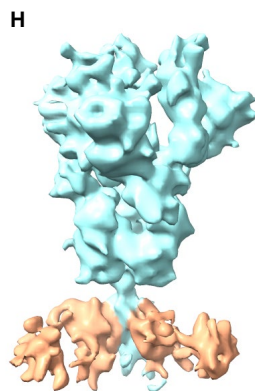

I Bound CV3-25 Fab

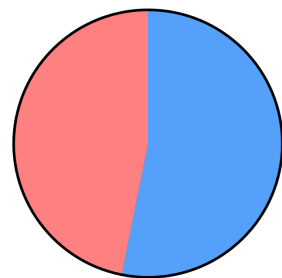

■ 53.15% 1 Fab  
■ 46.85% 2 Fabs

# Figure S6

**A**

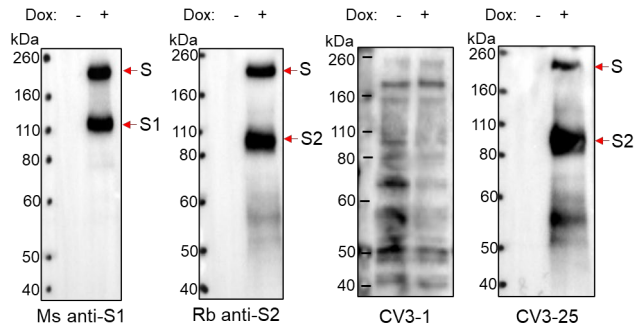

**B** SARS-CoV-2 S gp

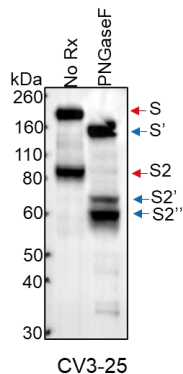

**C**

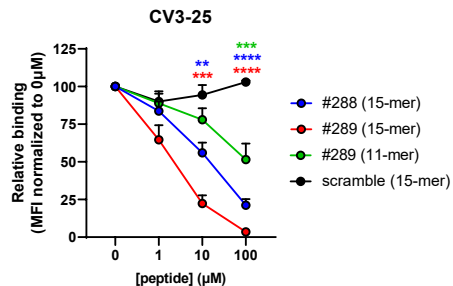

**D**

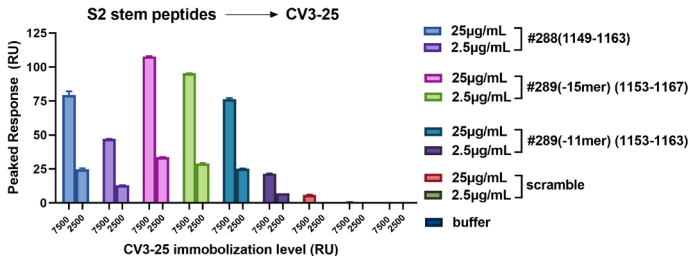

**E**

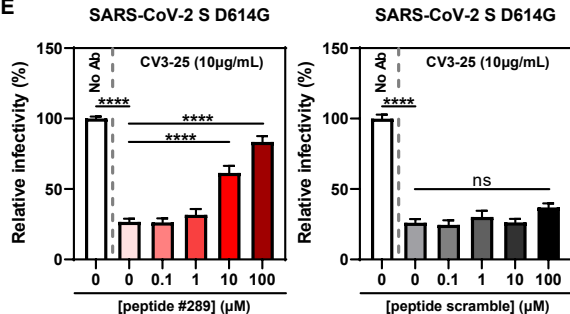

Source: https://www.biorxiv.org/content/10.1101/2021.08.02.454546v1.full.pdf
